# Supplementary material for: Identification of potential sialic acid binding proteins on cell membranes by proximity chemical labeling
Source: Royal Society of Chemistry journal article supplement (doi:10.1039/c9sc01360a), 2019-01-01
Supplement: c9sc01360a1.xlsx [file c9sc01360a1.xlsx]

## Sheet: PNT2 Cell line
Protein ID	Protein Short Name	Protein Full Name	Oxidized peptides	Oxidation Sites	Amino Acid Region	Membrane Location	Probability	Glycopeptides	Glycosylation Sites	Glycans	Amino Acid Region	Membrane Location	Probability	TMHMM Results
P02786	TFR1	HUMAN Transferrin receptor protein 1	K.LFGNM349EGDCPSDWK.T	349	87-760	extracellular	0.99	K.KDFEDLYTPVN251GSIVIVR.A	251	Hex(7)HexNAc(6)Fuc(0)NeuAc(4)	87-760	extracellular	0.99	intracellular 1 63
								K.QNNGAFN727ETLFR.N	727	Hex(5)HexNAc(4)Fuc(3)NeuAc(1)	87-760	extracellular	0.99	TMhelix 64 86
										Hex(9)HexNAc(2)Fuc(0)NeuAc(0)				extracellular 87 760
										Hex(8)HexNAc(2)Fuc(0)NeuAc(0)
P16070	CD44	HUMAN CD44 antigen	K.ESSETPDQFM725TADETR.N	725	673-742	intracellular	0.99	K.AFN57STLPTMAQMEK.A	57	Hex(7)HexNAc(6)Fuc(1)NeuAc(3)	1-649	extracellular	0.99	extracellular 1 649
										Hex(8)HexNAc(2)Fuc(0)NeuAc(0)				TMhelix 650 672
										Hex(9)HexNAc(2)Fuc(0)NeuAc(0)				intracellular 673 742
P09758	TACD2	HUMAN Tumor-associated calcium signal transducer 2	R.ALGSGM62AVDCSTLTSK.C	62	1-274	extracellular	0.99	R.QCN120QTSVCWCVNSVGVR.R	120	Hex(5)HexNAc(5)Fuc(4)NeuAc(2)	1-274	extracellular	0.99	extracellular 1 274
										Hex(7)HexNAc(2)Fuc(0)NeuAc(0)
										Hex(5)HexNAc(6)Fuc(5)NeuAc(0)
										Hex(3)HexNAc(4)Fuc(3)NeuAc(0)
										Hex(3)HexNAc(6)Fuc(0)NeuAc(0)				TMhelix 275 297
										Hex(8)HexNAc(2)Fuc(0)NeuAc(0)
										Hex(7)HexNAc(2)Fuc(0)NeuAc(0)
										Hex(6)HexNAc(2)Fuc(0)NeuAc(0)
										Hex(9)HexNAc(2)Fuc(0)NeuAc(0)
										Hex(8)HexNAc(2)Fuc(0)NeuAc(0)
										Hex(6)HexNAc(2)Fuc(0)NeuAc(0)				intracellular 298 323
								R.QN208TSQK.A	208	Hex(5)HexNAc(4)Fuc(1)NeuAc(1)	1-274	extracellular	0.99
										Hex(5)HexNAc(7)Fuc(1)NeuAc(0)
										Hex(6)HexNAc(2)Fuc(0)NeuAc(0)
										Hex(6)HexNAc(7)Fuc(0)NeuAc(0)
Q12797	ASPH	HUMAN Aspartyl/asparaginyl beta-hydroxylase	K.EGIESGDP520GTDDGR.F	520	76-758	extracellular	0.99	K.SSGN12SSSSGSGSGSTSAGSSSPGAR.R	12	Hex(5)HexNAc(4)Fuc(0)NeuAc(2)	1.-52	intracellular	0.99	intracellular 1 52
										Hex(6)HexNAc(4)Fuc(0)NeuAc(2)
										Hex(7)HexNAc(4)Fuc(1)NeuAc(1)
										Hex(5)HexNAc(5)Fuc(1)NeuAc(1)
										Hex(4)HexNAc(4)Fuc(2)NeuAc(1)				TMhelix 53 75
										Hex(6)HexNAc(4)Fuc(3)NeuAc(0)
										Hex(4)HexNAc(5)Fuc(0)NeuAc(0)
										Hex(10)HexNAc(2)Fuc(0)NeuAc(0)
										Hex(8)HexNAc(2)Fuc(0)NeuAc(0)
										Hex(9)HexNAc(2)Fuc(0)NeuAc(0)
										Hex(7)HexNAc(2)Fuc(0)NeuAc(0)
								R.LVQLFPN452DTSLK.N	452	Hex(8)HexNAc(2)Fuc(0)NeuAc(0)	76-758	extracellular	0.99	extracellular 76 758
										Hex(9)HexNAc(2)Fuc(0)NeuAc(0)
										Hex(6)HexNAc(2)Fuc(0)NeuAc(0)
								R.LVQLFPN452DTSLKNDLGVGYLLIGDNDNAK.K	452	Hex(8)HexNAc(2)Fuc(0)NeuAc(0)	76-758	extracellular	0.99
										Hex(8)HexNAc(2)Fuc(0)NeuAc(0)
								R.CAN706ETKTWEEGK.V	706	Hex(9)HexNAc(2)Fuc(0)NeuAc(0)	76-758	extracellular	0.99
										Hex(8)HexNAc(2)Fuc(0)NeuAc(0)
P01889	1B07	HUMAN HLA class I histocompatibility antigen, B-7 alpha chain	R.GYYNQSEAGSHTLQSM122YGCDVGPDGR.L	122	1-307	extracellular	0.99	R.GYYN110QSEAGSHTLQSMYGCDVGPDGR.L	110	Hex(5)HexNAc(7)Fuc(1)NeuAc(1)	1-307	extracellular	0.99	extracellular 1 307
										Hex(5)HexNAc(4)Fuc(2)NeuAc(1)
										Hex(5)HexNAc(7)Fuc(0)NeuAc(1)				TMhelix 308 330
										Hex(5)HexNAc(4)Fuc(3)NeuAc(0)
										Hex(5)HexNAc(7)Fuc(3)NeuAc(0)				intracellular 331 362
										Hex(5)HexNAc(7)Fuc(2)NeuAc(0)
			K.W268AAVVVPSGEEQR.Y	268	1-307	extracellular	0.99	R.GYYN110QSEAGSHTLQSMYGCDVGPDGR.L	110	Hex(8)HexNAc(2)Fuc(0)NeuAc(0)	1-307	extracellular	0.99
P05556	ITB1	HUMAN Integrin beta-1	R.HCECSTDEVNSEDM512DAYCR.K	512	1-728	extracellular	0.99	K.NKN94VTNR.S	94	Hex(9)HexNAc(2)Fuc(0)NeuAc(0)	1-728	extracellular	0.99	extracellular 1 728
			R.AEDYPIDLYYLM149DLSYSMKDDLENVK.S	149	1-728	extracellular	0.99	K.SCGECIQAGPNCGWCTN50STFLQEGMPTSAR.C	50	Hex(8)HexNAc(2)Fuc(0)NeuAc(0)	1-728	extracellular	0.99
										Hex(4)HexNAc(6)Fuc(0)NeuAc(0)
										Hex(9)HexNAc(2)Fuc(0)NeuAc(0)
										Hex(7)HexNAc(2)Fuc(0)NeuAc(0)
										Hex(3)HexNAc(6)Fuc(0)NeuAc(0)
										Hex(6)HexNAc(2)Fuc(0)NeuAc(0)
										Hex(3)HexNAc(4)Fuc(3)NeuAc(0)
								K.NGVN406GTGENGR.K	406	Hex(5)HexNAc(4)Fuc(1)NeuAc(1)	1-728	extracellular	0.99
										Hex(5)HexNAc(4)Fuc(1)NeuAc(0)
										Hex(5)HexNAc(4)Fuc(1)NeuAc(0)
								K.EN520SSEICSNNGECVCGQCVCR.K	520	Hex(3)HexNAc(4)Fuc(3)NeuAc(0)	1-728	extracellular	0.99
										Hex(3)HexNAc(6)Fuc(1)NeuAc(0)
										Hex(8)HexNAc(2)Fuc(0)NeuAc(0)
										Hex(7)HexNAc(2)Fuc(0)NeuAc(0)
										Hex(9)HexNAc(2)Fuc(0)NeuAc(0)
										Hex(6)HexNAc(2)Fuc(0)NeuAc(0)				TMhelix 729 751
										Hex(8)HexNAc(2)Fuc(0)NeuAc(0)
										Hex(9)HexNAc(2)Fuc(0)NeuAc(0)
										Hex(7)HexNAc(2)Fuc(0)NeuAc(0)
										Hex(4)HexNAc(6)Fuc(0)NeuAc(0)
								K.LRNPCTSEQN212CTSPFSYK.N	212	Hex(6)HexNAc(5)Fuc(1)NeuAc(0)	1-728	extracellular	0.99
										Hex(5)HexNAc(4)Fuc(2)NeuAc(0)
										Hex(7)HexNAc(6)Fuc(1)NeuAc(0)
										Hex(5)HexNAc(4)Fuc(1)NeuAc(0)
										Hex(5)HexNAc(4)Fuc(0)NeuAc(1)
										Hex(5)HexNAc(4)Fuc(1)NeuAc(1)
										Hex(6)HexNAc(3)Fuc(1)NeuAc(1)
										Hex(7)HexNAc(2)Fuc(0)NeuAc(0)
										Hex(6)HexNAc(5)Fuc(0)NeuAc(0)
										Hex(6)HexNAc(2)Fuc(0)NeuAc(0)
										Hex(9)HexNAc(2)Fuc(0)NeuAc(0)				intracellular 752 798
										Hex(8)HexNAc(2)Fuc(0)NeuAc(0)
										Hex(10)HexNAc(2)Fuc(0)NeuAc(0)
										Hex(7)HexNAc(2)Fuc(0)NeuAc(0)
										Hex(6)HexNAc(2)Fuc(0)NeuAc(0)
										Hex(9)HexNAc(2)Fuc(0)NeuAc(0)
										Hex(10)HexNAc(2)Fuc(0)NeuAc(0)
										Hex(8)HexNAc(2)Fuc(0)NeuAc(0)
								R.N269VTR.L	269	Hex(7)HexNAc(2)Fuc(0)NeuAc(0)	1-728	extracellular	0.99
										Hex(6)HexNAc(2)Fuc(0)NeuAc(0)
										Hex(8)HexNAc(2)Fuc(0)NeuAc(0)
										Hex(9)HexNAc(2)Fuc(0)NeuAc(0)
								K.NGVN406GTGENGR.K	406	Hex(9)HexNAc(2)Fuc(0)NeuAc(0)	1-728	extracellular	0.99
										Hex(6)HexNAc(2)Fuc(0)NeuAc(0)
										Hex(8)HexNAc(2)Fuc(0)NeuAc(0)
										Hex(9)HexNAc(2)Fuc(0)NeuAc(0)
										Hex(7)HexNAc(2)Fuc(0)NeuAc(0)
										Hex(8)HexNAc(2)Fuc(0)NeuAc(0)
										Hex(9)HexNAc(2)Fuc(0)NeuAc(0)
								K.CHEGN481GTFECGACR.C	481	Hex(8)HexNAc(2)Fuc(0)NeuAc(0)	1-728	extracellular	0.99
										Hex(9)HexNAc(2)Fuc(0)NeuAc(0)
										Hex(7)HexNAc(2)Fuc(0)NeuAc(0)
										Hex(6)HexNAc(2)Fuc(0)NeuAc(0)
								K.KDTCTQECSYFN669ITK.V	669	Hex(8)HexNAc(2)Fuc(0)NeuAc(0)	1-728	extracellular	0.99
										Hex(9)HexNAc(2)Fuc(0)NeuAc(0)
										Hex(9)HexNAc(2)Fuc(0)NeuAc(0)
										Hex(8)HexNAc(2)Fuc(0)NeuAc(0)
P10314	1A32	HUMAN HLA class I histocompatibility antigen, A-32 alpha chain	R.SWTAADM162AAQITQR.K	162	1-307	extracellular	0.99	R.YYN110QSEAGSHTIQMMYGCDVGPDGR.L	110	Hex(4)HexNAc(5)Fuc(2)NeuAc(1)	1-307	extracellular	0.99	extracellular 1 307
										Hex(4)HexNAc(4)Fuc(2)NeuAc(1)				TMhelix 308 330
										Hex(9)HexNAc(2)Fuc(0)NeuAc(0)
										Hex(10)HexNAc(2)Fuc(0)NeuAc(0)				intracellular 331 365
			R.KGGSYSQAASSDSAQGSDM358SLTACKV.-	358	331-365	extracellular	0.99	R.YYN110QSEAGSHTIQMMYGCDVGPDGR.L	110	Hex(5)HexNAc(6)Fuc(0)NeuAc(0)	1-307	extracellular	0.99
Q12907	LMAN2	HUMAN Vesicular integral-membrane protein VIP36	R.LPTGYYFGASAGTGDLSDNHDIISM271K.L	271	1-322	extracellular	0.99	R.VFPYISVMVNN183GSLSYDHSK.D	183	Hex(5)HexNAc(4)Fuc(2)NeuAc(1)	1-322	extracellular	0.99	extracellular 1 322
										Hex(5)HexNAc(4)Fuc(1)NeuAc(1)
										Hex(5)HexNAc(4)Fuc(1)NeuAc(1)				TMhelix 323 345
										Hex(6)HexNAc(4)Fuc(0)NeuAc(1)
										Hex(5)HexNAc(4)Fuc(0)NeuAc(1)
										Hex(5)HexNAc(4)Fuc(3)NeuAc(0)				intracellular 346 356
										Hex(5)HexNAc(4)Fuc(2)NeuAc(0)
										Hex(8)HexNAc(2)Fuc(0)NeuAc(0)
Q13740	CD166	HUMAN CD166 antigen	K.ADIQM216PFTCSVTYYGPSGQK.T	216	1-527	extracellular	0.99	K.LGDCISEDSYPDGN167ITWYR.N	167	Hex(5)HexNAc(4)Fuc(1)NeuAc(1)	1-527	extracellular	0.99	extracellular 1 527
			R.QIGDALP351VSCTISASR.N	351	1-527	extracellular	0.99			Hex(5)HexNAc(4)Fuc(2)NeuAc(1)
										Hex(5)HexNAc(4)Fuc(1)NeuAc(1)
										Hex(5)HexNAc(4)Fuc(2)NeuAc(0)
										Hex(5)HexNAc(4)Fuc(3)NeuAc(0)
										Hex(5)HexNAc(4)Fuc(2)NeuAc(0)
										Hex(6)HexNAc(4)Fuc(2)NeuAc(0)
								K.EGDN265ITLK.C	265	Hex(8)HexNAc(2)Fuc(0)NeuAc(0)	1-527	extracellular	0.99	TMhelix 528 550
										Hex(9)HexNAc(2)Fuc(0)NeuAc(0)		extracellular
								R.N306ATGDYK.C	306	Hex(5)HexNAc(4)Fuc(1)NeuAc(1)	1-527	extracellular	0.99
										Hex(8)HexNAc(2)Fuc(0)NeuAc(0)		extracellular
										Hex(5)HexNAc(4)Fuc(1)NeuAc(0)		extracellular
										Hex(5)HexNAc(4)Fuc(2)NeuAc(0)		extracellular
								R.N361ATVVWMK.D	361	Hex(9)HexNAc(2)Fuc(0)NeuAc(0)	1-527	extracellular	0.99
								K.IIISPEEN480VTLTCTAENQLER.T	480	Hex(5)HexNAc(4)Fuc(0)NeuAc(1)	1-527	extracellular	0.99	intracellular 551 583
										Hex(5)HexNAc(4)Fuc(2)NeuAc(0)		extracellular
										Hex(5)HexNAc(4)Fuc(1)NeuAc(0)		extracellular
										Hex(6)HexNAc(2)Fuc(0)NeuAc(0)		extracellular
										Hex(9)HexNAc(2)Fuc(0)NeuAc(0)		extracellular
										Hex(8)HexNAc(2)Fuc(0)NeuAc(0)		extracellular
										Hex(7)HexNAc(2)Fuc(0)NeuAc(0)		extracellular
O96005	CLPT1	HUMAN Cleft lip and palate transmembrane protein 1	K.NLLTGETEADPEM222IK.R	222	1-354	extracellular	0.82	K.DYYPIN295ESLASLPLR.V	295	Hex(9)HexNAc(2)Fuc(0)NeuAc(0)	1-354	extracellular	0.74	extracellular 1 354
														TMhelix 355 377
														intracellular 378 389
										Hex(7)HexNAc(2)Fuc(0)NeuAc(0)				TMhelix 390 412
														extracellular 413 416
														TMhelix 417 434
														intracellular 435 477
										Hex(8)HexNAc(2)Fuc(0)NeuAc(0)				TMhelix 478 497
														extracellular 498 506
														TMhelix 507 529
														intracellular 530 669
P00533	EGFR	HUMAN Epidermal growth factor receptor	R.ACGADSYEM318EEDGVR.K	318	1-645	extracellular	0.99	R.DIVSSDFLSN175MSMDFQNHLGSCQK.C	175	Hex(6)HexNAc(5)Fuc(2)NeuAc(0)	1-645	extracellular	0.99	extracellular 1 645
			R.EFVENSECIQCHPECLPQAM567NITCTGR.G	567	1-645	extracellular	0.99		175	Hex(8)HexNAc(2)Fuc(0)NeuAc(0)	1-645	extracellular	0.99
			K.TCPAGVM600GENNTLVWK.Y	600	1-645	extracellular	0.99	K.CDPSCPN196GSCWGAGEENCQK.L	196	Hex(8)HexNAc(2)Fuc(0)NeuAc(0)	1-645	extracellular	0.99
										Hex(7)HexNAc(2)Fuc(0)NeuAc(0)
										Hex(6)HexNAc(2)Fuc(0)NeuAc(0)				TMhelix 646 668
										Hex(5)HexNAc(4)Fuc(1)NeuAc(0)
								K.DSLSIN352ATNIK.H	352	Hex(8)HexNAc(2)Fuc(0)NeuAc(0)	1-645	extracellular	0.99
										Hex(7)HexNAc(2)Fuc(0)NeuAc(0)
										Hex(9)HexNAc(2)Fuc(0)NeuAc(0)				intracellular 669 772
										Hex(8)HexNAc(2)Fuc(0)NeuAc(0)
								K.N361CTSISGDLHILPVAFR.G	361	Hex(7)HexNAc(7)Fuc(1)NeuAc(0)	1-645	extracellular	0.99
										Hex(7)HexNAc(2)Fuc(0)NeuAc(0)
										Hex(8)HexNAc(2)Fuc(0)NeuAc(0)
										Hex(9)HexNAc(2)Fuc(0)NeuAc(0)				TMhelix 773 795
								R.N528VSR.G	528	Hex(8)HexNAc(2)Fuc(0)NeuAc(0)	1-645	extracellular	0.99
								R.EFVENSECIQCHPECLPQAMN568ITCTGR.G	568	Hex(8)HexNAc(2)Fuc(0)NeuAc(0)	1-645	extracellular	0.99
										Hex(9)HexNAc(2)Fuc(0)NeuAc(0)
								K.TCPAGVMGEN603NTLVWK.Y	603	Hex(9)HexNAc(2)Fuc(0)NeuAc(0)	1-645	extracellular	0.99	extracellular 796 1210
										Hex(8)HexNAc(2)Fuc(0)NeuAc(0)
								K.YADAGHVCHLCHPN623CTYGCTGPGLEGCPTNGPK.I	623	Hex(7)HexNAc(2)Fuc(0)NeuAc(0)	1-645	extracellular	0.99
										Hex(8)HexNAc(2)Fuc(0)NeuAc(0)
P15144	AMPN	HUMAN Aminopeptidase N	R.VMAVDALASSHPLSTP458ASEINTPAQISELFDAISYSK.G	458	35-967	extracellular	0.99	K.KLN128YTLSQGHR.V	128	Hex(8)HexNAc(2)Fuc(0)NeuAc(0)	35-967	extracellular	0.99	intracellular 1 11
			K.QWM780ENPNNNPIHPNLR.S	780	35-967	extracellular	0.99							TMhelix 12 34
			R.KVVATTQM212QAADAR.K	212	35-967	extracellular	0.99
			R.EIPENLMDQYSEVNAISTAC761SNGVPECEEMVSGLFK.Q	761	35-967	extracellular	0.99							extracellular 35 967
			R.VM444AVDALASSHPLSTPASEINTPAQISELFDAISYSK.G	444	35-967	extracellular	0.99
P35613	BASI	HUMAN Basigin	K.SSEHINEGETAM239LVCK.S	239	28-322	extracellular	0.9	K.ILLTCSLN160DSATEVTGHR.W	160	Hex(6)HexNAc(2)Fuc(0)NeuAc(0)	28-322	extracellular	0.9	intracellular 1 4
			R.SELHIENLNM292EADPGQYR.C	292	28-322	extracellular	0.9			Hex(9)HexNAc(2)Fuc(0)NeuAc(0)				TMhelix 5 27
										Hex(8)HexNAc(2)Fuc(0)NeuAc(0)				extracellular 28 322
								K.ALMN268GSESR.F	268	Hex(8)HexNAc(2)Fuc(0)NeuAc(0)	28-322	extracellular	0.9	TMhelix 323 345
										Hex(10)HexNAc(2)Fuc(0)NeuAc(0)				intracellular 346 385
P05187	PPB1	HUMAN Alkaline phosphatase, placental type	R.M232GTPDPEYPDDYSQGGTR.L	232				R.FNQCN144TTR.G	144	Hex(8)HexNAc(2)Fuc(0)NeuAc(0)		outside
Q9NZM1	MYOF	HUMAN Myoferlin	R.AEDIPQM373DDAFSQTVK.E	373	1-2025	extracellular	0.99							extracellular 1 2025
			K.NFQM1321ASITSPSLVVECGGER.V	1321	1-2025	extracellular	0.99							TMhelix 2026 2048
														intracellular 2049 2061
Q9P0L0	VAPA	HUMAN Vesicle-associated membrane protein-associated protein A	K.QDGPM159PKPHSVSLNDTETR.K	159	1-225	extracellular	0.61							extracellular 1 225
			R.CVFEM132PNENDKLNDMEPSK.A	132	1-225	extracellular	0.61							TMhelix 226 248
			R.CVFEMPNENDKLNDM142EPSK.A	142	1-225	extracellular	0.61							intracellular 249 249
Q14573	ITPR3	HUMAN Inositol 1,4,5-trisphosphate receptor type 3	R.AM2608SLVSNEGEGEQNEIR.I	2608	2521-2671	intracellular	0.46							extracellular 1 2200
														TMhelix 2201 2223
														intracellular 2224 2235
														TMhelix 2236 2255
														extracellular 2256 2264
														TMhelix 2265 2287
														intracellular 2288 2293
			K.TSSM1044LEVDDEGGR.M	1044	1-2200	extracellular	0.99							TMhelix 2294 2311
														extracellular 2312 2325
														TMhelix 2326 2348
														intracellular 2349 2368
														TMhelix 2369 2391
														extracellular 2392 2497
														TMhelix 2498 2520
														intracellular 2521 2671
P30455	1A36	HUMAN HLA class I histocompatibility antigen, A-36 alpha chain	R.SWTAADM162AAQITK.R	162	1-307	extracellular	0.99							extracellular 1 307
			K.W268AAVVVPSGEEQR.Y	268	1-307	extracellular	0.99							TMhelix 308 330
														intracellular 331 365
P05023	AT1A1	HUMAN Sodium/potassium-transporting ATPase subunit alpha-1	K.ADIGVAM734GIAGSDVSK.Q	734	345-775	intracellular	0.86							intracellular 1 97
														TMhelix 98 120
														extracellular 121 129
														TMhelix 130 149
														intracellular 150 289
														TMhelix 290 312
														extracellular 313 321
														TMhelix 322 344
														intracellular 345 775
														TMhelix 776 798
														extracellular 799 801
														TMhelix 802 824
														intracellular 825 861
														TMhelix 862 884
														extracellular 885 912
														TMhelix 913 932
														intracellular 933 952
														TMhelix 953 975
														extracellular 976 984
														TMhelix 985 1002
														intracellular 1003 1023
P05026	AT1B1	HUMAN Sodium/potassium-transporting ATPase subunit beta-1	R.DDM121IFEDCGDVPSEPK.E	121	58-303	extracellular	0.99							intracellular 1 34
														TMhelix 35 57
														extracellular 58 303
A0FGR8	ESYT2	HUMAN Extended synaptotagmin-2	K.SHM690SGSPGPGGSNTAPSTPVIGGSDKPGMEEK.A	690	149-921	extracellular	0.99							intracellular 1 125
														TMhelix 126 148
														extracellular 149 921
Q9Y394	DHRS7	HUMAN Dehydrogenase/reductase SDR family member 7	R.IDILVNNGGM141SQR.S	141	24-339	extracellular	0.38							intracellular 1 4
														TMhelix 5 23
														extracellular 24 339
Q07065	CKAP4	HUMAN Cytoskeleton-associated protein 4	R.STLQTM317ESDIYTEVR.E	317	132-602	extracellular	0.99							intracellular 1 108
														TMhelix 109 131
														extracellular 132 602
Q99805	TM9S2	HUMAN Transmembrane 9 superfamily member 2	K.PDC250SGPPMDISNK.A	250	1-300	extracellular	0.97							extracellular 1 300
														TMhelix 301 323
														intracellular 324 363
														TMhelix 364 386
														extracellular 387 395
														TMhelix 396 418
														intracellular 419 433
														TMhelix 434 456
														extracellular 457 470
														TMhelix 471 493
														intracellular 494 519
														TMhelix 520 542
														extracellular 543 556
														TMhelix 557 579
														intracellular 580 591
														TMhelix 592 611
														extracellular 612 630
														TMhelix 631 653
														intracellular 654 663
Q8N138	ORML3	HUMAN ORM1-like protein 3	-.M1NVGTAHSEVNPNTR.V	1	1-20	intracellular	0.96							intracellular 1 20
														TMhelix 21 43
														extracellular 44 94
														TMhelix 95 117
														intracellular 118 153
Q8NFZ8	CADM4	HUMAN Cell adhesion molecule 4	K.QTQY216VLDVQYSPTAR.I	216	1-323	extracellular	0.86							extracellular 1 323
														TMhelix 324 346
														intracellular 347 388
Q8TCT9	HM13	HUMAN Minor histocompatibility antigen H13	K.GEVTEM343FSYEESNPKDPAAVTESK.E	343	337-377	intracellular	0.96							extracellular 1 31
														TMhelix 32 54
														intracellular 55 74
														TMhelix 75 97
														extracellular 98 106
														TMhelix 107 129
														intracellular 130 209
														TMhelix 210 232
														extracellular 233 257
														TMhelix 258 277
														intracellular 278 289
														TMhelix 290 312
														extracellular 313 316
														TMhelix 317 336
														intracellular 337 377
Q8WWA1	TMM40	HUMAN Transmembrane protein 40	-.M1ETSASSSQPQDNSQVHR.E	1	1-158	intracellular	0.95							intracellular 1 158
														TMhelix 159 181
														extracellular 182 184
														TMhelix 185 207
														intracellular 208 233
Q93050	VPP1	HUMAN V-type proton ATPase 116 kDa subunit a isoform 1	R.M355QTNQTPPTYNK.T	355	1-399	extracellular	0.99							extracellular 1 399
														TMhelix 400 422
														intracellular 423 442
														TMhelix 443 465
														extracellular 466 539
														TMhelix 540 562
														intracellular 563 568
														TMhelix 569 591
														extracellular 592 634
														TMhelix 635 657
														intracellular 658 737
														TMhelix 738 760
														extracellular 761 769
														TMhelix 770 792
														intracellular 793 837
Q969L2	MAL2	HUMAN Protein MAL2	-.M1SAGGASVPPPPNPAVSFPPPR.V	1	1-31	intracellular	0.85							intracellular 1 31
														TMhelix 32 54
														extracellular 55 68
														TMhelix 69 91
														intracellular 92 102
														TMhelix 103 125
														extracellular 126 147
														TMhelix 148 170
														intracellular 171 176
Q6P1M0	S27A4	HUMAN Long-chain fatty acid transport protein 4	R.AGM550AAVASPTGNCDLER.F	550	157-643	extracellular	0.94							extracellular 1 19
														TMhelix 20 42
														intracellular 43 138
														TMhelix 139 156
														extracellular 157 643
Q6P4E1	CASC4	HUMAN Protein CASC4	R.GGDAGMP252GIEENDLAK.V	252	36-433	extracellular	0.99							intracellular 1 12
														TMhelix 13 35
														extracellular 36 433
Q15758	AAAT	HUMAN Neutral amino acid transporter B(0)	R.GPAGDATVASEKESVM541.-	541	437-541	extracellular	0.78							intracellular 1 52
														TMhelix 53 75
														extracellular 76 94
														TMhelix 95 117
														intracellular 118 129
														TMhelix 130 152
														extracellular 153 227
														TMhelix 228 245
														intracellular 246 264
														TMhelix 265 287
														extracellular 288 301
														TMhelix 302 324
														intracellular 325 336
														TMhelix 337 359
														extracellular 360 378
														TMhelix 379 401
														intracellular 402 413
														TMhelix 414 436
														extracellular 437 541
Q15836	VAMP3	HUMAN Vesicle-associated membrane protein 3	R.LQQTQNQVDEVVDIM29R.V	29	1-78	intracellular	0.92							intracellular 1 78
														TMhelix 79 98
														extracellular 99 100
P51572	BAP31	HUMAN B-cell receptor-associated protein 31	K.LQAAVDGPM241DKKEE.-	241	122-246	extracellular	0.79							intracellular 1 6
														TMhelix 7 29
														extracellular 30 43
														TMhelix 44 63
														intracellular 64 101
														TMhelix 102 121
														extracellular 122 246
P39656	OST48	HUMAN Dolichyl-diphosphooligosaccharide--protein glycosyltransferase 48 kDa subunit	R.GVGM202VADPDNPLVLDILTGSSTSYSFFPDKPITQYPHAVGK.N	202	44-424	extracellular	0.99							intracellular 1 20
														TMhelix 21 43
														extracellular 44 424
														TMhelix 425 447
														intracellular 448 456
P50416	CPT1A	HUMAN Carnitine O-palmitoyltransferase 1, liver isoform	R.TLETANCM97SSQTK.N	97	85-103	intracellular	0.96							extracellular 1 61
														TMhelix 62 84
														intracellular 85 103
														TMhelix 104 126
														extracellular 127 773
P13746	1A11	HUMAN HLA class I histocompatibility antigen, A-11 alpha chain	R.SWTAADM162AAQITK.R	162	1-307	extracellular	0.99							extracellular 1 307
														TMhelix 308 330
														intracellular 331 365
P17706	PTN2	HUMAN Tyrosine-protein phosphatase non-receptor type 2	K.M337QDTMEENSESALR.K	337	1-387	extracellular	0.69							extracellular 1 387
														TMhelix 388 410
														intracellular 411 415
O00264	PGRC1	HUMAN Membrane-associated progesterone receptor component 1	K.EGEEP177TVYSDEEEPKDESAR.K	177	43-195	intracellular	0.93							extracellular 1 19
														TMhelix 20 42
														intracellular 43 195
O15126	SCAM1	HUMAN Secretory carrier-associated membrane protein 1	K.AQQEFATGVM308SNK.T	308	281-338	intracellular	0.99							intracellular 1 153
														TMhelix 154 176
														extracellular 177 180
														TMhelix 181 203
														intracellular 204 215
														TMhelix 216 238
														extracellular 239 257
														TMhelix 258 280
														intracellular 281 338
O15258	RER1	HUMAN Protein RER1	K.VDPSLM92EDSDDGPSLPTK.Q	92	86-139	extracellular	0.98							extracellular 1 38
														TMhelix 39 61
														intracellular 62 62
														TMhelix 63 85
														extracellular 86 139
														TMhelix 140 162
														intracellular 163 196
Q14980	NUMA1	HUMAN Nuclear mitotic apparatus protein 1	R.AALM989ESQGQQQEER.G	989										outside
			R.ASM1970QPIQIAEGTGITTR.Q	1970
P11142	HSP7C	HUMAN Heat shock cognate 71 kDa protein	K.NQVAM61NPTNTVFDAK.R	61										outside
			R.RFDDAVVQSDM87K.H	87
P15924	DESP	HUMAN Desmoplakin	K.GLPSPYNM2819SSAPGSR.S	2819										outside
			R.RGVITDQNSDGYCQTGTM62SR.H	62
P26641	EF1G	HUMAN Elongation factor 1-gamma	K.AAAPAP259EEEMDECEQALAAEPK.A	259										outside
			K.KAAAPAPEEEM263DECEQALAAEPK.A	263
P68104	EF1A1	HUMAN Elongation factor 1-alpha 1	K.IGYNPDTVAFVPISGWNGDNM201LEPSANMPWFK.G	201										outside
			K.IGYNPDTVAFVPISGWNGDNMLEP204SANMPWFK.G	204
			K.IGYNPDTVAFVPISGWNGDNMLEPSANM208PWFK.G	208
			K.SGDAAIVDM404VPGKPMCVESFSDYPPLGR.F	404
			K.SGDAAIVDMVPGKPM410CVESFSDYPPLGR.F	410
			R.VETGVLKP274GMVVTFAPVNVTTEVK.S	274
			R.VETGVLKPGM276VVTFAPVNVTTEVK.S	276
B7ZAP0	RBG10	HUMAN Rab GTPase-activating protein 1-like, isoform 10	K.IQELEHQRGALM213NEIQAAK.N	213										outside
P04264	K2C1	HUMAN Keratin, type II cytoskeletal 1	R.M493SGECAPNVSVSVSTSHTTISGGGSR.G	493										outside
P07947	YES	HUMAN Tyrosine-protein kinase Yes	K.NGYIPSNYVAPADSIQAEEW158YFGK.M	158										outside
P08238	HS90B	HUMAN Heat shock protein HSP 90-beta	K.LGLGIDEDEVAAEEP700NAAVPDEIPPLEGDEDASR.M	700										outside
P09429	HMGB1	HUMAN High mobility group protein B1	K.M13SSYAFFVQTCR.E	13										outside
P10301	RRAS	HUMAN Ras-related protein R-Ras	R.LDILDTAGQEEFGAM93R.E	93										outside
P11021	GRP78	HUMAN 78 kDa glucose-regulated protein	K.TFAPEEISAM148VLTK.M	148										outside
P11234	RALB	HUMAN Ras-related protein Ral-B	R.QVP139VEEARSKAEEWGVQYVETSAK.T	139										outside
P20337	RAB3B	HUMAN Ras-related protein Rab-3B	K.M187SDSLDTDPSMLGSSK.N	187										outside
P20340	RAB6A	HUMAN Ras-related protein Rab-6A	R.VAAALPGM177ESTQDR.S	177										outside
P25705	ATPA	HUMAN ATP synthase subunit alpha, mitochondrial	K.TGTAEM51SSILEER.I	51										outside
P35221	CTNA1	HUMAN Catenin alpha-1	R.VIHVVTSEM560DNYEPGVYTEK.V	560										outside
P35222	CTNB1	HUMAN Catenin beta-1	R.TSM553GGTQQQFVEGVR.M	553										outside
P50570	DYN2	HUMAN Dynamin-2	R.AGVYPEKDQAENEDGAQENTFSM645DPQLER.Q	645										outside
P51149	RAB7A	HUMAN Ras-related protein Rab-7a	R.LVTM59QIWDTAGQER.F	59										outside
P61313	RL15	HUMAN 60S ribosomal protein L15	R.VLNSYW120VGEDSTYK.F	120										outside
P63000	RAC1	HUMAN Ras-related C3 botulinum toxin substrate 1	K.LTPITYPQGLAM145AK.E	145										outside
P63010	AP2B1	HUMAN AP-2 complex subunit beta	R.NVEGQDM886LYQSLK.L	886										outside
Q5JWF2	GNAS1	HUMAN Guanine nucleotide-binding protein G(s) subunit alpha isoforms XLas	K.QADY833VPSDQDLLR.C	833										outside
Q5T5U3	RHG21	HUMAN Rho GTPase-activating protein 21	R.YIPLIVDIC1167CK.L	1167										outside
Q5UIP0	RIF1	HUMAN Telomere-associated protein RIF1	R.ELDP2153SLVSANDSPSGMQTR.C	2153										outside
Q8IZJ3	CPMD8	HUMAN C3 and PZP-like alpha-2-macroglobulin domain-containing protein 8	R.YIQDLDAC245ETGTVR.A	245										outside
Q96A33	CCD47	HUMAN Coiled-coil domain-containing protein 47	K.DM376EALLPLMNMVIYSIDK.A	376										outside
Q99714	HCD2	HUMAN 3-hydroxyacyl-CoA dehydrogenase type-2	R.LVAGEM136GQNEPDQGGQR.G	136										outside
Q9H4L5	OSBL3	HUMAN Oxysterol-binding protein-related protein 3	R.GEM45NYTQEPPVQK.G	45										outside
Q00610	CLH1	HUMAN Clathrin heavy chain 1	K.AFM996TADLPNELIELLEK.I	996										outside
Q01082	SPTB2	HUMAN Spectrin beta chain, non-erythrocytic 1	R.TQTAIASEDM1090PNTLTEAEK.L	1090										outside
Q07666	KHDR1	HUMAN KH domain-containing, RNA-binding, signal transduction-associated protein 1	K.YLPELM108AEKDSLDPSFTHAMQLLTAEIEK.I	108										outside
Q13283	G3BP1	HUMAN Ras GTPase-activating protein-binding protein 1	R.FM109QTFVLAPEGSVANK.F	109										outside
Q9Y446	PKP3	HUMAN Plakophilin-3	R.LYDEM542PPSALQR.L	542										outside
P27797	CALR	HUMAN Calreticulin	K.KPEDWDEEMDGEW261EPPVIQNPEYK.G	261										outside
