# Supplementary material for: Identification of potential sialic acid binding proteins on cell membranes by proximity chemical labeling
Source: Royal Society of Chemistry journal article supplement (doi:10.1039/c9sc01360a), 2019-01-01
Supplement: c9sc01360a2.xlsx [file c9sc01360a2.xlsx]

## Sheet: Undiff Caco-2 Cell Line
Protein ID	Protein Short Name	Protein Full Name	Oxidized peptides	Oxidation Sites	Amino Acid Region	MembraneoutsideLocation	Probability	Glycopeptides	Glycosylation Sites	Glycans	Amino Acid Region	Membrane Location	Probability	TMHMM Results
P14625	ENPL	HUMAN Endoplasmin	K.NLLHVTDTGVGM154TR.E	154		outside		R.EEEAIQLDGLN62ASQIR.E	62	Hex(5)HexNAc(6)Fuc(4)Neu5Ac(1)				outside
P04844	RPN2	HUMAN Dolichyl-diphosphooligosaccharide--protein glycosyltransferase subunit 2	R.LDELGGVY198LQFEEGLETTALFVAATYKLMDHVGTEPSIK.E	198	30-538	extracellular	0.92847		N-linked: 106		30-538	extracellular	0.92835	intracellular 1 6
														TMhelix 7 29
														extracellular 30 538
														TMhelix 539 561
														intracellular 562 572
														TMhelix 573 595
														extracellular 596 604
														TMhelix 605 622
														intracellular 623 631
P05026	AT1B1	HUMAN Sodium/potassium-transporting ATPase subunit beta-1	R.DDM121IFEDCGDVPSEPK.E	121	58-303	extracellular	0.9874		N-linked: 158		58-303	extracellular	0.9874	intracellular 1 34
									N-linked: 193		58-303	extracellular	0.9874	TMhelix 35 57
									N-linked: 265		58-303	extracellular	0.98749	extracellular 58 303
P11169	GTR3	HUMAN Solute carrier family 2, facilitated glucose transporter member 3	K.DGVM481EMNSIEPAK.E	481	449-496	intracellular	0.70757		N-linked: 43		32-62	extracellular	0.86585	intracellular 1 8
														TMhelix 9 31
														extracellular 32 62
														TMhelix 63 85
														intracellular 86 91
														TMhelix 92 111
														extracellular 112 120
														TMhelix 121 143
			K.DGVMEM483NSIEPAK.E	483	449-496	intracellular	0.70757							intracellular 144 155
														TMhelix 156 178
														extracellular 179 182
														TMhelix 183 205
														intracellular 206 303
														TMhelix 304 326
														extracellular 327 335
			R.LWGTQDVSQDIQEM242KDESAR.M	242	206-303	intracellular	0.47998							TMhelix 336 355
														intracellular 356 366
														TMhelix 367 389
														extracellular 390 425
														TMhelix 426 448
														intracellular 449 496
P12830	CADH1	HUMAN Cadherin-1	K.LM670DNQNKDQVTTLEVSVCDCEGAAGVCR.K	670	1-708	extracellular	0.99984		N-linked: 558		1-708	extracellular	0.99994	extracellular 1 708
									N-linked: 570			extracellular	0.99983	TMhelix 709 731
									N-linked: 622			extracellular	0.99984	intracellular 732 882
									N-linked: 637			extracellular	0.99984
Q15758	AAAT	HUMAN Neutral amino acid transporter B(0)	R.GPAGDATVASEKESVM541.-	541	437-541	extracellular	0.78398		N-linked: 163		153-227	extracellular	0.9545	intracellular 1 52
														TMhelix 53 75
														extracellular 76 94
														TMhelix 95 117
														intracellular 118 129
														TMhelix 130 152
														extracellular 153 227
														TMhelix 228 245
									N-linked: 212		153-227	extracellular	0.9256	intracellular 246 264
														TMhelix 265 287
														extracellular 288 301
														TMhelix 302 324
														intracellular 325 336
														TMhelix 337 359
														extracellular 360 378
														TMhelix 379 401
														intracellular 402 413
														TMhelix 414 436
														extracellular 437 541
Q8TCT9	HM13	HUMAN Minor histocompatibility antigen H13	K.GEVTEM343FSYEESNPKDPAAVTESK.E	343	337-377	intracellular	0.95867		N-linked: 10		1-31	extracellular	0.88446	extracellular 1 31
														TMhelix 32 54
														intracellular 55 74
														TMhelix 75 97
														extracellular 98 106
														TMhelix 107 129
														intracellular 130 209
														TMhelix 210 232
									N-linked: 20		1-31	extracellular	0.88446	extracellular 233 257
														TMhelix 258 277
														intracellular 278 289
														TMhelix 290 312
														extracellular 313 316
														TMhelix 317 336
														intracellular 337 377
Q02413	DSG1	HUMAN Desmoglein-1	R.Y423VMGNNPADLLAVDSR.T	423	1-1049	extracellular	0.4454		O-linked: 36		1-1049	extracellular	0.44647	extracellular 1 1049
P25705	ATPA	HUMAN ATP synthase subunit alpha, mitochondrial	K.TGTAEM51SSILEER.I	51					N-linked: 76					outside
			R.NVQAEEM95VEFSSGLK.G	95
P62937	PPIA	HUMAN Peptidyl-prolyl cis-trans isomerase A	.M1VNPTVFFDIAVDGEPLGR.V	1					N-linked: 108					outside
			K.HTGPGILSM100ANAGPNTNGSQFFICTAK.T	100
			K.VKEGM136NIVEAMER.F	136
			K.VKEGMNIVEAM142ER.F	142
			R.IIP58GFMCQGGDFTR.H	58
			R.IIPGFM61CQGGDFTR.H	61
P06576	ATPB	HUMAN ATP synthase subunit beta, mitochondrial	K.GFQQILAGEYDHLPEQAFYM509VGPIEEAVAK.A	509					O-linked: 106					outside
			K.VALVYGQM272NEPPGAR.A	272
			R.IM145NVIGEPIDER.G	145
P40926	MDHM	HUMAN Malate dehydrogenase, mitochondrial	K.AGAGSATLSM251AYAGAR.F	251					O-linked: 33					outside
Q01082	SPTB2	HUMAN Spectrin beta chain, non-erythrocytic 1	R.TQTAIASEDM1090PNTLTEAEK.L	1090					O-linked: 2324					outside
Q01813	PFKAP	HUMAN ATP-dependent 6-phosphofructokinase, platelet type	K.AIGVLTSGGDAQGM39NAAVR.A	39					O-linked: 540					outside
P05023	AT1A1	HUMAN Sodium/potassium-transporting ATPase subunit alpha-1	K.ADIGVAM734GIAGSDVSK.Q	734	345-775	intracellular	0.86053							intracellular 1 97
														TMhelix 98 120
														extracellular 121 129
														TMhelix 130 149
														intracellular 150 289
														TMhelix 290 312
														extracellular 313 321
														TMhelix 322 344
														intracellular 345 775
														TMhelix 776 798
														extracellular 799 801
														TMhelix 802 824
														intracellular 825 861
														TMhelix 862 884
														extracellular 885 912
														TMhelix 913 932
														intracellular 933 952
														TMhelix 953 975
														extracellular 976 984
														TMhelix 985 1002
														intracellular 1003 1023
Q15836	VAMP3	HUMAN Vesicle-associated membrane protein 3	R.LQQTQNQVDEVVDIM29R.V	29	1-78	intracellular	0.92745							intracellular 1 78
														TMhelix 79 98
														extracellular 99 100
Q9NQC3	RTN4	HUMAN Reticulon-4	.M1EDLDQSPLVSSSDSPPRPQPAFK.Y	1	1-1025	extracellular	0.99993							extracellular 1 1025
														TMhelix 1026 1048
														intracellular 1049 1125
														TMhelix 1126 1148
														extracellular 1149 1192
P13667	PDIA4	HUMAN Protein disulfide-isomerase A4	K.FAM488EPEEFDSDTLR.E	488	25-645	extracellular	0.99996							intracellular 1 6
			K.VSQGQLVVM358QPEK.F	358	25-645	extracellular	0.99996							TMhelix 7 24
														extracellular 25 645
O75369	FLNB	HUMAN Filamin-B	K.SPFEVQVGPEAGM549QK.V	549										outside
			R.TFEM2020SDFIVDTR.D	2020
			R.Y1588MIGVTYGGDDIPLSPYR.I	1588
P04264	PK2C1	HUMAN Keratin, type II cytkeletal 1	R.M493SGECAPNVSVSVSTSHTTISGGGSR.G	493										outside
			K.W212ELLQQVDTSTR.T	212
P35579	MYH9	HUMAN Myosin-9	K.M941QQNIQELEEQLEEEESAR.Q	941										outside
			K.SMEAEM1682IQLQEELAAAER.A	1682
			R.ELEDATETADAM1910NR.E	1910
			R.IIGLDQVAGM627SETALPGAFK.T	627
			R.LTEM871ETLQSQLMAEK.L	871
			R.LTEMETLQSQLM879AEK.L	879
P15311	EZRI	HUMAN Ezrin	R.VTTM12DAELEFAIQPNTTGK.Q	12										outside
			R.VM90LGETNPADSKPGTIR.G	90
P26641	EF1G	HUMAN Elongation factor 1-gamma	K.AAAPAP259EEEMDECEQALAAEPK.A	259										outside
			K.KAAAPAPEEEM263DECEQALAAEPK.A	263
P60709	ACTB	HUMAN Actin, cytoplasmic 1	K.DLYANTVLSGGTTM315YPGIADR.M	315										outside
			K.LCYVALDFEQEM227ATAASSSSLEK.S	227
			.DDDIAALVVDNGSGM16CK.A	16
			R.CPEALFQPSFLGM269ESCGIHETTFNSIMK.C	269
			R.CPEALFQPSFLGMESCGIHETTFNSIM283K.C	283
			R.FRCPEALFQPSFLGM269ESCGIHETTFNSIMK.C	269
			R.HQGVM44VGMGQKDSYVGDEAQSK.R	44
			R.HQGVMVGM77GQKDSYVGDEAQSK.R	77
			R.KDLYANTVLSGGTTM305YPGIADR.M	305
			R.M313QKEITALAPSTMK.I	313
			R.MQKEITALAPSTM325K.I	325
			R.TTGIVM153DSGDGVTHTVPIYEGYALPHAILR.L	153
P62258	1433E	HUMAN 14-3-3 protein epsilon	.M1DDREDLVYQAK.L	1										outside
			K.AAFDDAIAELDTLSEESYKDSTLIM221QLLR.D	221
			K.VAGM33DVELTVEER.N	33
P62826	RAN	HUMAN GTP-binding nuclear protein Ran	K.LIGDPNLEFVAM179PALAPPEVVMDPALAAQYEHDLEVAQTTALPDEDDDL.-	179										outside
			K.LIGDPNLEFVAMP180ALAPPEVVMDPALAAQYEHDLEVAQTTALPDEDDDL.-	180
Q09666	AHNK	HUMAN Neuroblast differentiation-associated protein AHNAK	K.IEGEM1096QVPDVDIR.G	1096										outside
			K.ISM502QDVDLSLGSPK.L	502										outside
			K.M1418DAEVPDVNIEGPDAK.L	1418
			K.M1620DVNVGDIDIEGPEGK.L	1620
			R.ISM571SEVDLNVAAPK.V	571
Q14204	DYHC1	HUMAN Cytoplasmic dynein 1 heavy chain 1	K.NYM3372SNPSYNYEIVNR.A	3372										outside
			R.VLLTTQGVDM4338ISK.M	4338
			R.VLRPQVTAVAQQNQGEVPEPQDM505K.V	505										outside
P68104	EF1A1	HUMAN Elongation factor 1-alpha 1	K.NM102ITGTSQADCAVLIVAAGVGEFEAGISK.N	102										outside
			K.SGDAAIVDM404VPGKPMCVESFSDYPPLGR.F	404
			R.VETGVLKPGM276VVTFAPVNVTTEVK.S	276
P78371	TCPB	HUMAN T-complex protein 1 subunit beta	R.DASLM62VTNDGATILK.N	62										outside
			R.M445LPTIIADNAGYDSADLVAQLR.A	445
P84077	ARF1	HUMAN ADP-ribosylation factor 1	K.QDLP131NAMNAAEITDK.L	131										outside
			K.QDLPNAM134NAAEITDK.L	134
Q00610	CLH1	HUMAN Clathrin heavy chain 1	K.AFM996TADLPNELIELLEK.I	996										outside
			R.RPISADSAIM74NPASK.V	74
P06733	ENOA	HUMAN Alpha-enolase	K.LAM165QEFMILPVGAANFR.E	165										outside
			K.LAMQEFM169ILPVGAANFR.E	169
			K.VVIGM244DVAASEFFR.S	244
P07437	TBB5	HUMAN Tubulin beta chain	.M1REIVHIQAGQCGNQIGAK.F	1										outside
			K.EAESC]DCLQGFQLTHSLGGGTGSGM147GTLLISK.I	147
			K.EVDEQM330LNVQNK.N	330
			K.LTTPTYGDLNHLVSATM233SGVTTCLR.F	233
			K.M363AVTFIGNSTAIQELFK.R	363
			R.AILVDLEPGTM73DSVR.S	73
			R.LHFFM267PGFAPLTSR.G	267
P07900	HS90A	HUMAN Heat shock protein HSP 90-alpha	K.HGLEVIYM521IEPIDEYCVQQLK.E	521										outside
			K.LGLGIDEDDPTADDTSAAVTEEM716PPLEGDDDTSRMEEVD.-	716
			K.LGLGIDEDDPTADDTSAAVTEEMPPLEGDDDTSRM728EEVD.-	728
			R.YYTSASGDEM474VSLK.D	474
			R.YYTSASGDEM474VSLKDYCTR.M	474
P08238	HS90B	HUMAN Heat shock protein HSP 90-beta	K.LGLGIDEDEVAAEEPNAAVPDEIPPLEGDEDASRM720EEVD.-	720										outside
			R.GFEVVYM513TEPIDEYCVQQLK.E	513
			R.YHTSQSGDEM466TSLSEYVSR.M	466
P08727	K1C19	HUMAN Keratin, type I cytoskeletal 19	R.EVAGHTEQLQM291SR.S	291										outside
			R.SQYEVM259AEQNRK.D	259
			R.TEELNREVAGHTEQLQM291SR.S	291
			R.TLQGLEIELQSQLSM316K.A	316
P08865	RSSA	HUMAN 40S ribosomal protein SA	K.FLAAGTHLGGTNLDFQM34EQYIYK.R	34										outside
			M.SGALDVLQM10KEEDVLK.F	10
P11021	GRP78	HUMAN 78 kDa glucose-regulated protein	K.TFAPEEISAM148VLTK.M	148										outside
			R.AKFEELNM333DLFR.S	333
P11142	HSP7C	HUMAN Heat shock cognate 71 kDa protein	K.NQVAM61NPTNTVFDAK.R	61										outside
			K.SFYPEEVSSM122VLTK.M	122
P13645	K1C10	HUMAN Keratin, type I cytoskeletal 10	R.NVSTGDVNVEM306NAAPGVDLTQLLNNMR.S	306										outside
			R.NVSTGDVNVEMNAAPGVDLTQLLNNM321R.S	321
P38606	VATA	HUMAN V-type proton ATPase catalytic subunit A	R.LAEM368PADSGYPAYLGAR.L	368										outside
			R.TALVANTSNM318PVAAR.E	318
P31946	1433B	HUMAN 14-3-3 protein beta/alpha	K.TAFDEAIAELDTLNEESYKDSTLIM220QLLR.D	220										outside
P27348	1433T	HUMAN 14-3-3 protein theta	K.TAFDEAIAELDTLNEDSYKDSTLIM218QLLR.D	218										outside
P17980	PRS6A	HUMAN 26S protease regulatory subunit 6A	K.AM175EVDERPTEQYSDIGGLDK.Q	175										outside
P09110	THIK	HUMAN 3-ketoacyl-CoA thiolase, peroxisomal	R.SITVTQDEGIRP250STTMEGLAK.L	250										outside
P15880	RS2	HUMAN 40S ribosomal protein S2	K.LLM215MAGIDDCYTSAR.G	215										outside
P23396	RS3	HUMAN 40S ribosomal protein S3	K.GGKPEPPAM236PQPVPTA.-	236										outside
P05386	RLA1	HUMAN 60S acidic ribosomal protein P1	K.AAGVNVEPFW43PGLFAK.A	43										outside
O43707	ACTN4	HUMAN Alpha-actinin-4	R.M883APYQGPDAVPGALDYK.S	883										outside
P50995	ANX11	HUMAN Annexin A11	R.LLISLSQGNRDESTNVDM354SLAQR.D	354										outside
P07355	ANXA2	HUMAN Annexin A2	K.SYSPYDM240LESIR.K	240										outside
P12429	ANXA3	HUMAN Annexin A3	K.LTFDEY216RNISQK.D	216										outside
P09525	ANXA4	HUMAN Annexin A4	K.AASGFNAM17EDAQTLR.K	17										outside
P14868	SYDC	HUMAN Aspartate--tRNA ligase, cytoplasmic	R.EAGVEM362GDEDDLSTPNEK.L	362										outside
P53396	ACLY	HUMAN ATP-citrate synthase	K.IGNTGGM642LDNILASK.L	642										outside
P31939	PUR9	HUMAN Bifunctional purine biosynthesis protein PURH	R.DVSELTGFP58EMLGGR.V	58										outside
P11586	C1TC	HUMAN C-1-tetrahydrofolate synthase, cytoplasmic	R.M747FGIPVVVAVNAFK.T	747										outside
P27708	PYR1	HUMAN CAD protein	R.M522AEIGEHVAPSEAANSLEQAQAAAER.L	522										outside
P23528	COF1	HUMAN Cofilin-1	M.ASGVAVSDGVIKVFNDM18K.V	18										outside
P12277	KCRB	HUMAN Creatine kinase B-type	R.LEQGQAIDDLM377PAQK.-	377										outside
O00273	DFFA	HUMAN DNA fragmentation factor subunit alpha	.M1EVTGDAGVPESGEIR.T	1										outside
P13639	EF2	HUMAN Elongation factor 2	R.LM341EPIYLVEIQCPEQVVGGIYGVLNR.K	341										outside
P49411	EFTU	HUMAN Elongation factor Tu, mitochondrial	R.TIGTGLVTNTLAM442TEEEK.N	442										outside
P55060	XPO2	HUMAN Exportin-2	K.EHDPVGQM920VNNPK.I	920										outside
P49327	FAS	HUMAN Fatty acid synthase	R.GNAGQSNYGFANSAM2041ER.I	2041										outside
P21333	FLNA	HUMAN Filamin-A	K.SPFSVAVSP967SLDLSK.I	967										outside
P17931	LEG3	HUMAN Galectin-3	R.M130LITILGTVKPNANR.I	130										outside
P06744	G6PI	HUMAN Glucose-6-phosphate isomerase	K.ILLANFLAQTEALM437R.G	437										outside
P09211	GSTP1	HUMAN Glutathione S-transferase P	K.DQQEAALVDM93VNDGVEDLR.C	93										outside
P04406	G3P	HUMAN Glyceraldehyde-3-phosphate dehydrogenase	R.VIISAPSADAPM132FVMGVNHEK.Y	132										outside
P09429	HMGB1	HUMAN High mobility group protein B1	K.M13SSYAFFVQTCR.E	13										outside
P35908	K22E	HUMAN Keratin, type II cytoskeletal 2 epidermal	R.TSQNSELNNM257QDLVEDYKK.K	257										outside
P00558	PGK1	HUMAN Phosphoglycerate kinase 1	K.VLNNM251EIGTSLFDEEGAK.I	251										outside
P18669	PGAM1	HUMAN Phosphoglycerate mutase 1	K.HLEGLSEEAIM206ELNLPTGIPIVYELDK.N	206										outside
P13796	PLSL	HUMAN Plastin-2	K.M166INLSVPDTIDER.T	166										outside
P13797	PLST	HUMAN Plastin-3	K.M169INLSVPDTIDER.A	169										outside
P26599	PTBP1	HUMAN Polypyrimidine tract-binding protein 1	.M1DGIVPDIAVGTKR.G	1										outside
P07737	PROF1	HUMAN Profilin-1	R.DSLLQDGEFSM86DLR.T	86										outside
P30101	PDIA3	HUMAN Protein disulfide-isomerase A3	K.M434DATANDVPSPYEVR.G	434										outside
P50395	GDIB	HUMAN Rab GDP dissociation inhibitor beta	R.M424TGSEFDFEEMKR.K	424										outside
P20340	RAB6A	HUMAN Ras-related protein Rab-6A	R.VAAALPGM177ESTQDR.S	177										outside
P18206	VINC	HUMAN Vinculin	K.LVQAAQM94LQSDPYSVPAR.D	94										outside
P13010	XRCC5	HUMAN X-ray repair cross-complementing protein 5	R.DDEAAAVALSSLIHALDDLDM389VAIVR.Y	389										outside
