# Supplementary material for: Identification of potential sialic acid binding proteins on cell membranes by proximity chemical labeling
Source: Royal Society of Chemistry journal article supplement (doi:10.1039/c9sc01360a), 2019-01-01
Supplement: c9sc01360a3.xlsx [file c9sc01360a3.xlsx]

## Sheet: Diff Caco-2 Cell line
Protein ID	Protein Short Name	Protein Full Name	Oxidized peptides	Oxidation Sites	Amino Acid Region	Membrane Location	Probability	Glycopeptides	Glycosylation Sites	Glycans	Amino Acid Region	Membrane Location	Probability	TMHMM Results
P05556	ITB1	HUMAN Integrin beta-1	R.HCECSTDEVNSEDM512DAYCR.K	512	1-728	extracellular	0.99995	K.LRNPCTSEQN212CTSPFSYK.N	212	Hex(5)HexNAc(5)Fuc(0)NeuAc(1)	1-728	extracellular	0.99991	extracellular 1 728
										Hex(5)HexNAc(5)Fuc(1)NeuAc(1)				TMhelix 729 751
								R.N269VTR.L	269	Hex(5)HexNAc(4)Fuc(0)NeuAc(1)	1-728	extracellular	0.99992	intracellular 752 798
										Hex(5)HexNAc(5)Fuc(0)NeuAc(1)
P02786	TFR1	HUMAN Transferrin receptor protein 1	R.M365VTSESK.N	365	87-760	extracellular	0.99991	K.DFEDLYTPVN251GSIVIVR.A	251	Hex(4)HexNAc(5)Fuc(2)NeuAc(1)	87-760	extracellular	0.99988	intracellular 1 63
										Hex(4)HexNAc(5)Fuc(3)NeuAc(1)
										Hex(5)HexNAc(4)Fuc(2)NeuAc(1)
										Hex(5)HexNAc(5)Fuc(1)NeuAc(1)				TMhelix 64 86
										Hex(5)HexNAc(5)Fuc(2)NeuAc(1)
										Hex(5)HexNAc(5)Fuc(0)NeuAc(1)
										Hex(5)HexNAc(5)Fuc(3)NeuAc(1)
										Hex(5)HexNAc(6)Fuc(1)NeuAc(1)				extracellular 87 760
										Hex(5)HexNAc(6)Fuc(2)NeuAc(1)
										Hex(6)HexNAc(6)Fuc(1)NeuAc(1)
										Hex(6)HexNAc(6)Fuc(2)NeuAc(1)
								K.QNNGAFN727ETLFR.N	727	Hex(4)HexNAc(6)Fuc(4)NeuAc(1)	87-760	extracellular	0.9992
P50895	BCAM	HUMAN Basal cell adhesion molecule	R.LASAEMQGSELQVTM92HDTR.G	92	1-548	extracellular	0.99991	R.TQN439FTLLVQGSPELK.T	439	Hex(4)HexNAc(3)Fuc(0)NeuAc(1)	1-548	extracellular	0.99991	extracellular 1 548
										Hex(5)HexNAc(3)Fuc(0)NeuAc(1)
										Hex(6)HexNAc(3)Fuc(0)NeuAc(1)
										Hex(5)HexNAc(4)Fuc(0)NeuAc(1)
										Hex(4)HexNAc(5)Fuc(0)NeuAc(1)				TMhelix 549 571
										Hex(5)HexNAc(5)Fuc(0)NeuAc(1)
										Hex(4)HexNAc(4)Fuc(3)NeuAc(1)
										Hex(5)HexNAc(5)Fuc(1)NeuAc(1)
										Hex(5)HexNAc(5)Fuc(2)NeuAc(1)				intracellular 572 628
										Hex(6)HexNAc(6)Fuc(0)NeuAc(1)
										Hex(5)HexNAc(6)Fuc(2)NeuAc(1)
										Hex(6)HexNAc(6)Fuc(1)NeuAc(1)
P14410	SUIS	HUMAN Sucrase-isomaltase, intestinal	R.DLNWNTWGM1133FTR.D	1133	33-1827	extracellular	1	R.YGYAN1235TSEVR.E	1235	Hex(5)HexNAc(5)Fuc(1)NeuAc(1)	33-1827	extracellular	0.99999	intracellular 1 12
										Hex(6)HexNAc(6)Fuc(1)NeuAc(1)
			R.W1545MQLGAFYPYSR.N	1545	33-1827	extracellular	0.99808	R.YIIILDPAISGN1303ETK.T	1303	Hex(5)HexNAc(3)Fuc(0)NeuAc(1)	33-1827	extracellular	0.99999
										Hex(6)HexNAc(3)Fuc(0)NeuAc(1)
										Hex(5)HexNAc(4)Fuc(0)NeuAc(1)
										Hex(5)HexNAc(4)Fuc(1)NeuAc(1)
										Hex(6)HexNAc(4)Fuc(0)NeuAc(1)				TMhelix 13 32
										Hex(6)HexNAc(4)Fuc(1)NeuAc(1)
										Hex(7)HexNAc(4)Fuc(0)NeuAc(1)
										Hex(6)HexNAc(5)Fuc(0)NeuAc(1)
										Hex(7)HexNAc(4)Fuc(1)NeuAc(1)
										Hex(5)HexNAc(5)Fuc(2)NeuAc(1)				extracellular 33 1827
										Hex(6)HexNAc(5)Fuc(1)NeuAc(1)
										Hex(7)HexNAc(5)Fuc(0)NeuAc(1)
										Hex(7)HexNAc(4)Fuc(2)NeuAc(1)
										Hex(6)HexNAc(5)Fuc(2)NeuAc(1)
										Hex(7)HexNAc(5)Fuc(1)NeuAc(1)
										Hex(7)HexNAc(5)Fuc(2)NeuAc(1)
Q4KMQ2	ANO6	HUMAN Anoctamin-6	R.M897IEAVDNNLRPK.S	897	848-910	intracellular	0.92674	K.N153R.S	153	Hex(5)HexNAc(7)Fuc(0)NeuAc(1)	1-294	intracellular	0.98763	intracellular 1 294
										Hex(4)HexNAc(5)Fuc(4)NeuAc(1)				TMhelix 295 317
										Hex(6)HexNAc(6)Fuc(1)NeuAc(1)				extracellular 318 369
										Hex(7)HexNAc(4)Fuc(3)NeuAc(1)				TMhelix 370 392
										Hex(5)HexNAc(5)Fuc(4)NeuAc(1)				intracellular 393 457
										Hex(7)HexNAc(5)Fuc(2)NeuAc(1)				TMhelix 458 480
										Hex(6)HexNAc(6)Fuc(2)NeuAc(1)				extracellular 481 504
										Hex(5)HexNAc(7)Fuc(2)NeuAc(1)				TMhelix 505 527
										Hex(6)HexNAc(6)Fuc(3)NeuAc(1)				intracellular 528 554
										Hex(7)HexNAc(6)Fuc(2)NeuAc(1)				TMhelix 555 572
										Hex(5)HexNAc(6)Fuc(5)NeuAc(1)				extracellular 573 670
										Hex(5)HexNAc(7)Fuc(4)NeuAc(1)				TMhelix 671 693
										Hex(6)HexNAc(7)Fuc(3)NeuAc(1)				intracellular 694 720
										Hex(7)HexNAc(7)Fuc(2)NeuAc(1)				TMhelix 721 743
										Hex(5)HexNAc(7)Fuc(5)NeuAc(1)
								K.N790K.S	790	Hex(6)HexNAc(6)Fuc(2)NeuAc(1)	744-824	extracellular	0.95948	extracellular 744 824
										Hex(6)HexNAc(5)Fuc(4)NeuAc(1)
										Hex(5)HexNAc(6)Fuc(4)NeuAc(1)				TMhelix 825 847
										Hex(5)HexNAc(6)Fuc(5)NeuAc(1)
										Hex(5)HexNAc(7)Fuc(4)NeuAc(1)				intracellular 848 910
										Hex(7)HexNAc(7)Fuc(3)NeuAc(1)
O75976	CBPD	HUMAN Carboxypeptidase D	K.LVGNM138HGDETVSR.Q	138	1-1299	extracellular	0.99453	K.N855VTVK.S	855	Hex(5)HexNAc(5)Fuc(1)NeuAc(1)	1-1299	extracellular	0.99999	extracellular 1 1299
										Hex(5)HexNAc(5)Fuc(2)NeuAc(1)
			K.YIGNM563HGNEVVGR.E	563	1-1299	extracellular	0.99998	R.GKDLDTDFTNN1070ASQPETK.A	1070	Hex(4)HexNAc(3)Fuc(1)NeuAc(1)	1-1299	extracellular	0.99969
										Hex(5)HexNAc(3)Fuc(1)NeuAc(1)
										Hex(5)HexNAc(4)Fuc(1)NeuAc(1)
										Hex(4)HexNAc(5)Fuc(1)NeuAc(1)
										Hex(5)HexNAc(5)Fuc(1)NeuAc(1)
								R.HIWSLEISNKPN978VSEPEEPK.I	978	Hex(4)HexNAc(5)Fuc(0)NeuAc(1)	1-1299	extracellular	0.99999
										Hex(4)HexNAc(5)Fuc(1)NeuAc(1)
										Hex(5)HexNAc(5)Fuc(0)NeuAc(1)
										Hex(5)HexNAc(5)Fuc(1)NeuAc(1)
										Hex(6)HexNAc(5)Fuc(0)NeuAc(1)
										Hex(6)HexNAc(5)Fuc(1)NeuAc(1)
										Hex(6)HexNAc(6)Fuc(3)NeuAc(1)
								R.LLN172TTDVYLLPSLNPDGFER.A	172	Hex(4)HexNAc(4)Fuc(2)NeuAc(1)	1-1299	extracellular	0.99453	TMhelix 1300 1322
										Hex(5)HexNAc(4)Fuc(1)NeuAc(1)
										Hex(4)HexNAc(5)Fuc(1)NeuAc(1)
										Hex(5)HexNAc(4)Fuc(2)NeuAc(1)
										Hex(6)HexNAc(4)Fuc(1)NeuAc(1)
										Hex(5)HexNAc(5)Fuc(1)NeuAc(1)
										Hex(5)HexNAc(6)Fuc(0)NeuAc(1)
										Hex(5)HexNAc(4)Fuc(3)NeuAc(1)
										Hex(5)HexNAc(5)Fuc(2)NeuAc(1)
										Hex(6)HexNAc(5)Fuc(1)NeuAc(1)
										Hex(7)HexNAc(5)Fuc(0)NeuAc(1)
										Hex(5)HexNAc(5)Fuc(3)NeuAc(1)
										Hex(6)HexNAc(5)Fuc(2)NeuAc(1)
										Hex(6)HexNAc(6)Fuc(1)NeuAc(1)
										Hex(7)HexNAc(4)Fuc(3)NeuAc(1)				intracellular 1323 1380
										Hex(7)HexNAc(5)Fuc(2)NeuAc(1)
										Hex(6)HexNAc(6)Fuc(2)NeuAc(1)
										Hex(6)HexNAc(6)Fuc(3)NeuAc(1)
										Hex(7)HexNAc(6)Fuc(2)NeuAc(1)
								R.N626NSNNFDLNR.N	626	Hex(5)HexNAc(3)Fuc(0)NeuAc(1)	1-1299	extracellular	0.99998
										Hex(6)HexNAc(3)Fuc(0)NeuAc(1)
										Hex(4)HexNAc(5)Fuc(0)NeuAc(1)
										Hex(6)HexNAc(4)Fuc(0)NeuAc(1)
										Hex(5)HexNAc(5)Fuc(0)NeuAc(1)
										Hex(6)HexNAc(4)Fuc(1)NeuAc(1)
										Hex(7)HexNAc(4)Fuc(0)NeuAc(1)
										Hex(7)HexNAc(4)Fuc(1)NeuAc(1)
								R.RFANEYPN522ITR.L	522	Hex(5)HexNAc(5)Fuc(1)NeuAc(1)	1-1299	extracellular	0.99998
										Hex(5)HexNAc(5)Fuc(2)NeuAc(1)
P27487	DPP4	HUMAN Dipeptidyl peptidase 4	R.QHIEM348STTGWVGR.F	348	30-766	extracellular	0.99933	K.LDFIILN520ETK.F	520	Hex(6)HexNAc(3)Fuc(0)NeuAc(1)	30-766	extracellular	0.99933	intracellular 1 6
										Hex(6)HexNAc(3)Fuc(1)NeuAc(1)
										Hex(5)HexNAc(4)Fuc(1)NeuAc(1)
										Hex(5)HexNAc(4)Fuc(2)NeuAc(1)
										Hex(5)HexNAc(5)Fuc(1)NeuAc(1)
										Hex(5)HexNAc(4)Fuc(3)NeuAc(1)
			R.GSGYQGDKIM591HAINR.R	591	30-766	extracellular	0.9991			Hex(4)HexNAc(4)Fuc(2)NeuAc(1)
										Hex(4)HexNAc(4)Fuc(3)NeuAc(1)
								R.IPN150NTQWVTWSPVGHK.L	150	Hex(5)HexNAc(5)Fuc(1)NeuAc(1)	30-766	extracellular	0.99925
										Hex(5)HexNAc(5)Fuc(2)NeuAc(1)
										Hex(6)HexNAc(5)Fuc(1)NeuAc(1)
										Hex(6)HexNAc(6)Fuc(0)NeuAc(1)
										Hex(5)HexNAc(5)Fuc(3)NeuAc(1)				TMhelix 7 29
										Hex(6)HexNAc(5)Fuc(2)NeuAc(1)
										Hex(6)HexNAc(6)Fuc(1)NeuAc(1)
										Hex(6)HexNAc(5)Fuc(3)NeuAc(1)
										Hex(6)HexNAc(6)Fuc(2)NeuAc(1)
										Hex(6)HexNAc(5)Fuc(4)NeuAc(1)
										Hex(7)HexNAc(6)Fuc(3)NeuAc(1)
										Hex(7)HexNAc(7)Fuc(2)NeuAc(1)
										Hex(7)HexNAc(6)Fuc(4)NeuAc(1)
										Hex(7)HexNAc(7)Fuc(3)NeuAc(1)
										Hex(7)HexNAc(7)Fuc(4)NeuAc(1)
										Hex(7)HexNAc(7)Fuc(5)NeuAc(1)
								R.IQN321YSVMDICDYDESSGR.W	321	Hex(6)HexNAc(4)Fuc(0)NeuAc(1)	30-766	extracellular	0.99933	extracellular 30 766
										Hex(5)HexNAc(4)Fuc(2)NeuAc(1)
										Hex(6)HexNAc(4)Fuc(1)NeuAc(1)
										Hex(7)HexNAc(4)Fuc(0)NeuAc(1)
										Hex(5)HexNAc(5)Fuc(1)NeuAc(1)
										Hex(6)HexNAc(5)Fuc(0)NeuAc(1)
										Hex(5)HexNAc(5)Fuc(2)NeuAc(1)
								R.N685STVMSR.A	685	Hex(5)HexNAc(5)Fuc(0)NeuAc(1)	30-766	extracellular	0.89444
										Hex(6)HexNAc(5)Fuc(0)NeuAc(1)
										Hex(5)HexNAc(5)Fuc(3)NeuAc(1)
										Hex(6)HexNAc(5)Fuc(2)NeuAc(1)
										Hex(4)HexNAc(7)Fuc(3)NeuAc(1)
Q9UIQ6	LCAP	HUMAN Leucyl-cystinyl aminopeptidase	R.GLGEHEM63EEDEEDYESSAK.L	63	1-111	intracellular	0.98841	R.N664YSK.Y	664	Hex(5)HexNAc(5)Fuc(1)NeuAc(1)	132-1025	extracellular	0.99993	intracellular 1 111
										Hex(5)HexNAc(5)Fuc(2)NeuAc(1)				TMhelix 112 131
														extracellular 132 1025
Q10472	GALT1	HUMAN Polypeptide N-acetylgalactosaminyltransferase 1	R.NVETNQCLDNM446AR.K	446	30-559	extracellular	0.99428	R.N552VTLPEIF.-	552	Hex(4)HexNAc(5)Fuc(1)NeuAc(1)	30-559	extracellular	0.99428	intracellular 1 6
										Hex(5)HexNAc(4)Fuc(2)NeuAc(1)
										Hex(6)HexNAc(4)Fuc(1)NeuAc(1)
										Hex(5)HexNAc(5)Fuc(1)NeuAc(1)				TMhelix 7 29
										Hex(6)HexNAc(4)Fuc(2)NeuAc(1)
										Hex(7)HexNAc(4)Fuc(1)NeuAc(1)
										Hex(5)HexNAc(5)Fuc(2)NeuAc(1)				extracellular 30 559
										Hex(6)HexNAc(5)Fuc(2)NeuAc(1)
										Hex(6)HexNAc(5)Fuc(3)NeuAc(1)
Q7Z7H5	TMED4	HUMAN Transmembrane emp24 domain-containing protein 4	K.EVFLP70STPGLGMHVEVKDPDGK.V	705	30-194	intracellular	0.975	R.FTFTSHTPGDHQICLHSN117STR.M	117	Hex(5)HexNAc(4)Fuc(0)NeuAc(1)	30-194	intracellular	0.97546	extracellular 1 14
										Hex(5)HexNAc(4)Fuc(1)NeuAc(1)				TMhelix 15 34
										Hex(5)HexNAc(5)Fuc(2)NeuAc(1)				intracellular 35 194
										Hex(5)HexNAc(5)Fuc(3)NeuAc(1)				TMhelix 195 214
										Hex(5)HexNAc(6)Fuc(3)NeuAc(1)				extracellular 215 227
										Hex(5)HexNAc(6)Fuc(4)NeuAc(1)
Q14108	SCRB2	HUMAN Lysosome membrane protein 2	K.NGAPIIM337SFPHFYQADER.F	337	30-433	extracellular	0.67384	K.CNMIN249GTDGDSFHPLITK.D	249	Hex(4)HexNAc(4)Fuc(1)NeuAc(1)	30-433	extracellular	0.67505	intracellular 1 6
								K.NGTNDGDYVFLTGEDSYLN224FTK.I	224	Hex(6)HexNAc(5)Fuc(1)NeuAc(2)	30-433	extracellular	0.67505	TMhelix 7 29
								K.ANIQFGDN105GTTISAVSNK.A	105	Hex(6)HexNAc(7)Fuc(4)NeuAc(4)	30-433	extracellular	0.67596	extracellular 30 433
														TMhelix 434 456
														intracellular 457 478
Q9Y639	NPTN	HUMAN Neuroplastin	R.KRPDEVPDDDEPAGPM381K.T	381	361-398	intracellular	0.994	K.AN229ATIEVK.A	229	Hex(4)HexNAc(5)Fuc(0)NeuAc(1)	1-337	extracellular	0.99434	extracellular 1 337
														TMhelix 338 360
														intracellular 361 398
P02771	FETA	HUMAN Alpha-fetoprotein	R.ESSLLNQHACAVM227K.N	227				K.VN251FTEIQK.L	251	Hex(4)HexNAc(5)Fuc(1)NeuAc(1)				outside
										Hex(5)HexNAc(4)Fuc(1)NeuAc(1)
										Hex(5)HexNAc(5)Fuc(2)NeuAc(1)
										Hex(4)HexNAc(5)Fuc(1)NeuAc(1)
										Hex(5)HexNAc(4)Fuc(1)NeuAc(1)
										Hex(5)HexNAc(5)Fuc(1)NeuAc(1)
			R.HEM490TPVNPGVGQCCTSSYANR.R	490						Hex(5)HexNAc(6)Fuc(0)NeuAc(1)
										Hex(5)HexNAc(5)Fuc(2)NeuAc(1)
										Hex(5)HexNAc(6)Fuc(3)NeuAc(1)
										Hex(5)HexNAc(5)Fuc(3)NeuAc(1)
										Hex(5)HexNAc(5)Fuc(0)NeuAc(2)
			R.HEMT491PVNPGVGQCCTSSYANR.R	491						Hex(5)HexNAc(5)Fuc(1)NeuAc(2)
										Hex(4)HexNAc(5)Fuc(1)NeuAc(2)
										Hex(5)HexNAc(5)Fuc(0)NeuAc(2)
										Hex(5)HexNAc(5)Fuc(1)NeuAc(2)
P14625	ENPL	HUMAN Endoplasmin	K.NLLHVTDTGVGM154TR.E	154				K.HNN227DTQHIWESDSNEFSVIADPR.G	227	Hex(6)HexNAc(4)Fuc(4)NeuAc(1)				outside
								R.EEEAIQLDGLN62ASQIR.E	62	Hex(5)HexNAc(6)Fuc(4)NeuAc(1)
P04844	RPN2	HUMAN Dolichyl-diphosphooligosaccharide--protein glycosyltransferase subunit 2	K.TSFTPVGDVFELNFM337NVK.F	337	30-538	extracellular	0.92852	R.SNLDPSNVDSLFYAAQASQALSGCEISISN106ETK.D	106	Hex(5)HexNAc(6)Fuc(3)NeuAc(2)	30-538	extracellular	0.92835	intracellular 1 6
														TMhelix 7 29
														extracellular 30 538
														TMhelix 539 561
														intracellular 562 572
														TMhelix 573 595
														extracellular 596 604
														TMhelix 605 622
														intracellular 623 631
Q06481	APLP2	HUMAN Amyloid-like protein 2	K.AVCSQEAM315TGPCR.A	315	36-693	extracellular	0.99985	R.RN541QSLSLLYK.V	541	Hex(2)HexNAc(8)Fuc(0)NeuAc(0)	36-693	extracellular	0.99985	intracellular 1 12
														TMhelix 13 35
										Hex(2)HexNAc(9)Fuc(0)NeuAc(0)				extracellular 36 693
														TMhelix 694 716
														intracellular 717 763
P00533	EGFR	HUMAN Epidermal growth factor receptor	R.ACGADSYEM318EEDGVRK.C	318	1-645	extracellular	0.99912	K.DSLSIN352ATNIK.H	352	Hex(2)HexNAc(6)Fuc(0)NeuAc(0)	1-645	extracellular	0.99912	extracellular 1 645
										Hex(2)HexNAc(7)Fuc(0)NeuAc(0)				TMhelix 646 668
										Hex(2)HexNAc(8)Fuc(0)NeuAc(0)				intracellular 669 772
								K.N361CTSISGDLHILPVAFR.G	361	Hex(2)HexNAc(7)Fuc(0)NeuAc(0)	1-645	extracellular	0.99912	TMhelix 773 795
										Hex(2)HexNAc(8)Fuc(0)NeuAc(0)				extracellular 796 1210
										Hex(2)HexNAc(9)Fuc(0)NeuAc(0)
Q13586	STIM1	HUMAN Stromal interaction molecule 1	R.DLTHSDSESSLHM527SDR.Q	527	233-685	extracellular	0.81865	R.LAVTN171TTMTGTVLK.M	171	Hex(2)HexNAc(7)Fuc(0)NeuAc(0)	1-213	intracellular	0.73922	intracellular 1 213
										Hex(2)HexNAc(8)Fuc(0)NeuAc(0)				TMhelix 214 232
										Hex(2)HexNAc(9)Fuc(0)NeuAc(0)				extracellular 233 685
Q4G148	GXLT1	HUMAN Glucoside xylosyltransferase 1	K.TGVNSGVMLMNM279TR.M	279	30-440	extracellular	0.99703	K.FN237STQIAAMAPEHEEPR.I	2375	Hex(2)HexNAc(8)Fuc(0)NeuAc(0)	30-440	extracellular	0.99792	intracellular 1 6
														TMhelix 7 29
														extracellular 30 440
Q9NZ08	ERAP1	HUMAN Endoplasmic reticulum aminopeptidase 1	K.QE547HYMKGSDGAPDTGYLWHVPLTFITSK.S	547				K.CFDAMEVDALN414SSHPVSTPVENPAQIR.E	414	Hex(2)HexNAc(5)Fuc(0)NeuAc(0)				outside
										Hex(2)HexNAc(6)Fuc(0)NeuAc(0)
										Hex(2)HexNAc(7)Fuc(0)NeuAc(0)
										Hex(6)HexNAc(3)Fuc(0)NeuAc(0)
										Hex(3)HexNAc(4)Fuc(0)NeuAc(0)
										Hex(2)HexNAc(6)Fuc(0)NeuAc(0)
										Hex(3)HexNAc(5)Fuc(0)NeuAc(0)
										Hex(2)HexNAc(8)Fuc(0)NeuAc(0)
Q9UHG3	PCYOX	HUMAN Prenylcysteine oxidase 1	R.L75ATMMVQGQEYEAGGSVIHPLNLHMK.R	75				K.GELN353TSIFSSR.P	353	Hex(2)HexNAc(7)Fuc(0)NeuAc(0)				outside
										Hex(2)HexNAc(7)Fuc(0)NeuAc(0)
										Hex(2)HexNAc(8)Fuc(0)NeuAc(0)
										Hex(2)HexNAc(8)Fuc(0)NeuAc(0)
										Hex(2)HexNAc(9)Fuc(0)NeuAc(0)
										Hex(2)HexNAc(9)Fuc(0)NeuAc(0)
										Hex(2)HexNAc(1)Fuc(0)NeuAc(0)
								K.LLHALGGDDFLGMLN196R.T	196	Hex(2)HexNAc(8)Fuc(0)NeuAc(0)
										Hex(2)HexNAc(9)Fuc(0)NeuAc(0)
P62820	RAB1A	HUMAN Ras-related protein Rab-1A	K.NATNVEQSFM166TMAAEIK.K	166				K.N157ATNVEQSFMTMAAEIK.K	157	Hex(2)HexNAc(1)Fuc(1)NeuAc(0)				outside
			R.M176GPGATAGGAEK.S	176						Hex(2)HexNAc(1)Fuc(2)NeuAc(0)
P34741	SDC2	HUMAN Syndecan-2	R.KM121DPAEEDTNVYTEK.H	121	1-146	extracellular	0.94245		O-linked:41		1-146	extracellular	0.94244	extracellular 1 146
									O-linked:55		1-146	extracellular	0.94244	TMhelix 147 169
									O-linked:57		1-146	extracellular	0.94244	intracellular 170 201
P46059	S15A1	HUMAN Solute carrier family 15 member 1	K.SNPYFM699SGANSQK.Q	699	672-708	intracellular	0.772		N-linked:50		32-50	extracellular	0.70417	intracellular 1 8
														TMhelix 9 31
														extracellular 32 50
														TMhelix 51 73
									N-linked:404		381-584	extracellular	0.95199	intracellular 74 84
														TMhelix 85 107
														extracellular 108 121
														TMhelix 122 144
									N-linked:408		381-584	extracellular	0.94457	intracellular 145 163
														TMhelix 164 186
														extracellular 187 200
														TMhelix 201 223
									N-linked:509		381-584	extracellular	0.92356	intracellular 224 279
														TMhelix 280 297
														extracellular 298 326
														TMhelix 327 349
									N-linked:514		381-584	extracellular	0.92382	intracellular 350 360
														TMhelix 361 380
														extracellular 381 584
														TMhelix 585 607
									N-linked:562		381-584	extracellular	0.92366	intracellular 608 619
														TMhelix 620 639
														extracellular 640 648
														TMhelix 649 671
														intracellular 672 708
P50443	S26A2	HUMAN Sulfate transporter	K.NM88ILGFLPVLQWLPK.Y	88	1-111	intracellular	0.982		N-linked:199		172-216	intracellular	0.97986	intracellular 1 111
														TMhelix 112 134
														extracellular 135 148
														TMhelix 149 171
														intracellular 172 216
														TMhelix 217 239
									N-linked:205		172-216	intracellular	0.97982	extracellular 240 242
														TMhelix 243 265
														intracellular 266 271
														TMhelix 272 294
														extracellular 295 375
														TMhelix 376 398
									N-linked:357		295-375	extracellular	0.95592	intracellular 399 418
														TMhelix 419 441
														extracellular 442 455
														TMhelix 456 478
														intracellular 479 512
														TMhelix 513 535
														extracellular 536 739
Q15758	AAAT	HUMAN Neutral amino acid transporter B(0)	R.GPAGDATVASEKESVM541.-	541	437-541	extracellular	0.78398		N-linked:163		153-227	extracellular	0.9545	intracellular 1 52
														TMhelix 53 75
														extracellular 76 94
														TMhelix 95 117
														intracellular 118 129
														TMhelix 130 152
														extracellular 153 227
														TMhelix 228 245
														intracellular 246 264
									N-linked:212		153-227	extracellular	0.9256	TMhelix 265 287
														extracellular 288 301
														TMhelix 302 324
														intracellular 325 336
														TMhelix 337 359
														extracellular 360 378
														TMhelix 379 401
														intracellular 402 413
														TMhelix 414 436
														extracellular 437 541
Q86UP2	KTN1	HUMAN Kinectin	K.ECM1106AGTSGSEEVK.V	1106	30-1357	extracellular	1		N-linked:172		30-1357	extracellular	1	intracellular 1 6
									N-linked:435		30-1357		1	TMhelix 7 29
									N-linked:772		30-1357		1	extracellular 30 1357
Q9BRK5	CAB45	HUMAN 45 kDa calcium-binding protein	K.TAEHFQEAM139EESK.T	139	35-362	extracellular	0.88519		N-linked:40		35-362	extracellular	0.88516	intracellular 1 11
														TMhelix 12 34
														extracellular 35 362
Q9NQ84	GPC5C	HUMAN G-protein coupled receptor family C group 5 member C	R.AEDM413YSAQSHQAATPPKDGK.N	413	298-441	intracellular	0.998		N-linkd:191		179-208	extracellular	0.999	intracellular 1 6
														TMhelix 7 26
														extracellular 27 55
														TMhelix 56 78
														intracellular 79 84
														TMhelix 85 107
														extracellular 108 121
														TMhelix 122 144
														intracellular 145 155
														TMhelix 156 178
														extracellular 179 208
														TMhelix 209 231
														intracellular 232 242
														TMhelix 243 265
														extracellular 266 279
														TMhelix 280 297
														intracellular 298 441
Q6UWM9	UD2A3	HUMAN UDP-glucuronosyltransferase 2A3	R.TVITDSSYKENAM341R.L	341	30-490	extracellular	0.9879		O-linked:313		30-490	extracellular	0.9879	intracellular 1 6
														TMhelix 7 29
														extracellular 30 490
														TMhelix 491 513
														intracellular 514 527
Q14697	GANAB	HUMAN Neutral alpha-glucosidase AB	R.WYQM666GAYQPFFR.A	666	33-944	extracellular	0.99971		N-linked:97		33-944	extracellular	0.99967	intracellular 1 12
														TMhelix 13 32
														extracellular 33 944
P49755	TMEDA	HUMAN Transmembrane emp24 domain-containing protein 10	R.RLEDLSESIVNDFAYM168KK.R	168	38-185	intracellular	0.991		N-linked:179		38-185	intracellular	0.99093	extracellular 1 14
														TMhelix 15 37
														intracellular 38 185
														TMhelix 186 208
														extracellular 209 219
P23284	PPIB	HUMAN Peptidyl-prolyl cis-trans isomerase B	K.HYGPGWVSM140ANAGK.D	140	34-216	extracellular	0.94237		N-linked:148		34-216	extracellular	0.94243	intracellular 1 10
														TMhelix 11 33
														extracellular 34 216
P02671	FIBA	HUMAN Fibrinogen alpha chain	K.ESSSHHP565GIAEFPSR.G	565					O-linked:320					outside
									O-linked:351
									N-linked:453
									N-linked:686
P25705	ATPA	HUMAN ATP synthase subunit alpha, mitochondrial	K.QVAGTM433K.L	433					O-linked:76					outside
			K.TGTAEM51SSILEER.I	51
P27797	CALR	HUMAN Calreticulin	K.EQFLDGDGW33TSR.W	33					N-linked:344					outside
			K.HEQNIDC115GGGYVK.L	115
			K.HEQNIDCGGGY119VK.L	119
			K.HKSDF46GK.F	46
			K.IKDPDASKPEDW219DER.A	219
Q01082	SPTB2	HUMAN Spectrin beta chain, non-erythrocytic 1	K.FM1468ELLEPLNER.K	1468					O-linked:2324					outside
			K.KQEDFM1215TTMDANEEK.I	1215
			K.KQQMLENQM1429EVR.K	1429
			K.QQM1424LENQMEVR.K	1424
			K.QQMLENQM1429EVR.K	1429
			K.VIESTQDLGNDLAGVM992ALQR.K	992
			R.VHLENM133GSHDIVDGNHR.L	133
P35222	CTNB1	HUMAN Catenin beta-1	R.HQEAEM480AQNAVR.L	480					O-linked:23					outside
P06576	ATPB	HUMAN ATP synthase subunit beta, mitochondrial	K.TVLIM217ELINNVAK.A	217					O-linked:106					outside
P14923	PLAK	HUMAN Junction plakoglobin	R.ALM180GSPQLVAAVVR.T	180					O-linked:14					outside
Q14980	NUMA1	HUMAN Nuclear mitotic apparatus protein 1	R.AALM989ESQGQQQEER.G	989					O-linked:1844					outside
P61586	RHOA	HUMAN Transforming protein RhoA	K.M134KQEPVKPEEGR.D	134					O-linked:34					outside
P62937	PPIA	HUMAN Peptidyl-prolyl cis-trans isomerase A	K.VKEGMNIVEAM142ER.F	142					N-linked:108					outside
B2RUZ4	SMIM1	HUMAN Small integral membrane protein 1	.M1QPQESHVHYSR.W	1	1-52	extracellular	0.53647							extracellular 1 52
														TMhelix 53 75
														intracellular 76 78
O95210	STBD1	HUMAN Starch-binding domain-containing protein 1	R.VAVM257PAGSQQVSVR.F	257	22-358	extracellular	0.8692							intracellular 1 2
														TMhelix 3 21
														extracellular 22 358
P05023	AT1A1	HUMAN Sodium/potassium-transporting ATPase subunit alpha-1	K.KADIGVAM734GIAGSDVSK.Q	734	345-775	intracellular	0.861							intracellular 1 95
														TMhelix 96 118
														extracellular 119 129
														TMhelix 130 148
														intracellular 149 290
														TMhelix 291 313
			K.SFYPEEVSSM122VLTK.M	122	119-129	extracellular	0.93234							extracellular 314 321
														TMhelix 322 344
														intracellular 345 775
														TMhelix 776 798
														extracellular 799 801
														TMhelix 802 824
														intracellular 825 849
			R.DM32DELKK.E	32	1-95	intracellular	0.935							TMhelix 850 872
														extracellular 873 912
														TMhelix 913 935
														intracellular 936 954
														TMhelix 955 977
														extracellular 978 982
														TMhelix 983 1001
														intracellular 1002 1023
P20020	AT2B1	HUMAN Plasma membrane calcium-transporting ATPase 1	R.HLDACETM466GNATAICSDK.T	466	442-854	extracellular	0.5248							extracellular 1 375
														TMhelix 376 394
														intracellular 395 418
														TMhelix 419 441
														extracellular 442 854
														TMhelix 855 877
														intracellular 878 931
														TMhelix 932 950
														extracellular 951 971
														TMhelix 972 990
														intracellular 991 1002
														TMhelix 1003 1025
														extracellular 1026 1039
														TMhelix 1040 1058
														intracellular 1059 1258
P51572	BAP31	HUMAN B-cell receptor-associated protein 31	K.LQAAVDGPM241DKKEE.-	241	122-246	extracellular	0.7954							intracellular 1 6
														TMhelix 7 29
														extracellular 30 43
														TMhelix 44 62
														intracellular 63 102
														TMhelix 103 121
														extracellular 122 246
Q15005	SPCS2	HUMAN Signal peptidase complex subunit 2	K.FFDHSGTLVM205DAYEPEISR.L	205	135-226	intracellular	0.944							intracellular 1 84
														TMhelix 85 103
														extracellular 104 111
														TMhelix 112 134
														intracellular 135 226
Q15363	TMED2	HUMAN Transmembrane emp24 domain-containing protein 2	K.YTFAAHM86DGTYK.F	86	26-268	extracellular	0.4445							intracellular 1 6
														TMhelix 7 25
														extracellular 26 168
														TMhelix 169 191
														intracellular 192 201
Q8NBX0	SCPDL	HUMAN Saccharopine dehydrogenase-like oxidoreductase	K.VEDPPLDPW247LVPHSCGQVCER.E	247	1-888	extracellular	0.99812							extracellular 1 888
														TMhelix 889 907
														intracellular 908 911
Q8N138	ORML3	HUMAN ORM1-like protein 3	.M1NVGTAHSEVNPNTR.V	1	1-20	intracellular	0.957							intracellular 1 20
														TMhelix 21 43
														extracellular 44 46
														TMhelix 47 65
														intracellular 66 153
Q6ZNB6	NFXL1	HUMAN NF-X1-type zinc finger protein NFXL1	K.GPEAGYVATPIAMVQAAM383TLLSDASHLPK.A	383	300-429	intracellular	0.731							extracellular 1 276
														TMhelix 277 299
														intracellular 300 429
Q99805	TM9S2	HUMAN Transmembrane 9 superfamily member 2	K.HTHIDKPDCSGPP254MDISNK.A	254	1-300	extracellular	0.97511							extracellular 1 300
														TMhelix 301 323
														intracellular 324 364
														TMhelix 365 387
														extracellular 388 398
														TMhelix 399 421
														intracellular 422 433
														TMhelix 434 456
														extracellular 457 470
			K.HTHIDKPDCSGPPM255DISNK.A	255	1-300	extracellular	0.97511							TMhelix 471 493
														intracellular 494 520
														TMhelix 521 543
														extracellular 544 554
														TMhelix 555 577
														intracellular 578 589
														TMhelix 590 612
														extracellular 613 630
														TMhelix 631 653
														intracellular 654 663
P07355	ANXA2	HUMAN Annexin A2	K.SYSPYDM240LESIR.K	240										outside
			R.LYDSM278K.G	278
			R.SEVDM300LK.I	300
P07437	TBB5	HUMAN Tubulin beta chain	K.EVDEQM330LNVQNK.N	330										outside
			K.LTTPTYGDLNHLVSATMSGV236TTCLR.F	236
			K.LTTPTYGDLNHLVSATMSGVTTC239LR.F	239
P08727	K1C19	HUMAN Keratin, type I cytoskeletal 19	R.EVAGHTEQLQM291SR.S	291										outside
			R.LASY94LDK.V	94
			R.SQY266EVMAEQNRK.D	266
			R.SQYEVM259AEQNRK.D	259
			R.TDLEM202QIEGLKEELAYLK.K	202
			R.TEELNR280.E	280
			R.TEELNREVAGHTEQLQM291SR.S	291
			R.TLQGLEIELQSQLSM316K.A	316
P04406	G3P	HUMAN Glyceraldehyde-3-phosphate dehydrogenase	K.VIHDNFGIVEGLM175TTVHAITATQK.T	175										outside
			R.VIISAPSADAPMFVM133GVNHEK.Y	133
O60716	CTND1	HUMAN Catenin delta-1	K.SDKKPDREEIQMSNM893GSNTK.S	893										outside
			R.TVQPVAM158GPDGLPVDASSVSNNYIQTLGR.D	158
P35579	MYH9	HUMAN Myosin-9	K.NKHEAM1038ITDLEER.L	1038										outside
			R.ALEEAM1489EQKAELER.L	1489
			R.ELEDATETADAM1910NR.E	1910
			R.IM329GIPEEEQMGLLR.V	329
			R.NTDQASM365PDNTAAQK.V	365
			R.TEMEDLM1510SSKDDVGK.S	1510
Q86WJ1	CHD1L	HUMAN Chromodomain-helicase-DNA-binding protein 1-like	K.SAVLH884AQSSSSSSR.Q	884										outside
			K.SAVLHAQSSSSSSR893.Q	893
P11021	GRP78	HUMAN 78 kDa glucose-regulated protein	K.TFAPEEISAM148VLTK.M	148										outside
			R.M541VNDAEKFAEEDKK.L	541
			R.VM263EHFIK.L	263
			R.RFDDAVVQSDM87K.H	87
P60709	ACTB	HUMAN Actin, cytoplasmic 1	M.DDDIAALVVDNGSGM16CK.A	16										outside
			R.FRCPEALFQPSFLGM269ESCGIHETTFNSIMK.C	269
			R.FRCPEALFQPSFLGMESCGIHETTFNSIM283K.C	283
			R.TTGIVM163DSGDGVTHTVPIYEGYALPHAILR.L	163
P35221	CTNA1	HUMAN Catenin alpha-1	K.SQGM849ASLNLPAVSWK.M	849										outside
			R.M452SASQLEALCPQVINAALALAAKPQSK.L	452
P13667	PDIA4	HUMAN Protein disulfide-isomerase A4	K.M583DATANDVPSDRYK.V	583										outside
			K.VSQGQLVVM358QPEK.F	358
Q9H4G0	E41L1	HUMAN Band 4.1-like protein 1	R.V721SAMDNTQQVDGSASVGR.E	721										outside
			R.VSAM724DNTQQVDGSASVGR.E	724
			R.VSAMDNT727QQVDGSASVGR.E	727
Q09666	AHNK	HUMAN Neuroblast differentiation-associated protein AHNAK	K.ISM502QDVDLSLGSPK.L	502										outside
			K.M1236DIDVPDVEVQGPDWHLK.M	1236
Q13813	SPTN1	HUMAN Spectrin alpha chain, non-erythrocytic 1	K.GNAM850VEEGHFAAEDVK.A	850										outside
			R.EQADYCVSHM2445KPYVDGK.G	2445
O00515	LAD1	HUMAN Ladinin-1	K.IPSKEEEADM354SSPTQR.T	354										outside
O15145	ARPC3	HUMAN Actin-related protein 2/3 complex subunit 3	M.PAYHSSLM9DPDTK.L	9										outside
O43707	ACTN4	HUMAN Alpha-actinin-4	R.LSNRPAFM373PSEGK.M	373										outside
O75369	FLNB	HUMAN Filamin-B	K.VM2441YTPMAPGNYLISVK.Y	244										outside
O94832	MYO1D	HUMAN Unconventional myosin-Id	R.SFHSFYQLLQGGSEQM215LR.S	215										outside
O95716	RAB3D	HUMAN Ras-related protein Rab-3D	K.M187NESLEPSSSSGSNGK.G	187										outside
O95793	STAU1	HUMAN Double-stranded RNA-binding protein Staufen homolog 1	R.NAAENM348LEILGFK.V	348										outside
P00387	NB5R3	HUMAN NADH-cytochrome b5 reductase 3	K.SVGM177IAGGTGITPMLQVIR.A	177										outside
P07237	PDIA1	HUMAN Protein disulfide-isomerase	K.M425DSTANEVEAVK.V	425										outside
P09327	VILI	HUMAN Villin-1	K.FDATSM380HVKPQVAAQQK.M	380										outside
P0CW22	RS17L	HUMAN 40S ribosomal protein S17-like	K.LLDFGSLSNLQVTQPTVGM126NFK.T	126										outside
P11586	C1TC	HUMAN C-1-tetrahydrofolate synthase, cytoplasmic	R.M747FGIPVVVAVNAFK.T	747										outside
P11940	PABP1	HUMAN Polyadenylate-binding protein 1	K.ITGM584LLEIDNSELLHMLESPESLR.S	584										outside
P13010	XRCC5	HUMAN X-ray repair cross-complementing protein 5	K.KYAPTEAQLNAVDALIDSM461SLAK.K	461										outside
P13639	EF2	HUMAN Elongation factor 2	K.TGTITTFEHAHNM494R.V	494										outside
P13861	KAP2	HUMAN cAMP-dependent protein kinase type II-alpha regulatory subunit	K.M251FESFIESVPLLK.S	251										outside
P17931	LEG3	HUMAN Galectin-3	R.M130LITILGTVKPNANR.I	130										outside
P20340	RAB6A	HUMAN Ras-related protein Rab-6A	R.VAAALPGM177ESTQDR.S	177										outside
P21796	VDAC1	HUMAN Voltage-dependent anion-selective channel protein 1	K.LETAVNLAW210TAGNSNTRFGIAAK.Y	210										outside
P22087	FBRL	HUMAN rRNA 2'-O-methyltransferase fibrillarin	K.NVM87VEPHRHEGVFICR.G	87										outside
P23396	RS3	HUMAN 40S ribosomal protein S3	K.GGKPEPPAM236PQPVPTA.-	236										outside
P26599	PTBP1	HUMAN Polypyrimidine tract-binding protein 1	.M1DGIVPDIAVGTKR.G	1										outside
P27216	ANX13	HUMAN Annexin A13	K.GM30GTNEAAIIEILSGR.T	30										outside
P39656	OST48	HUMAN Dolichyl-diphosphooligosaccharide--protein glycosyltransferase 48 kDa subunit	R.GVGM212VADPDNPLVLDILTGSSTSYSFFPDKPITQYPHAVGK.N	212										outside
P42356	PI4KA	HUMAN Phosphatidylinositol 4-kinase alpha	K.PCPPEVTPH1237YIWIDFLVQR.F	1237										outside
P53621	COPA	HUMAN Coatomer subunit alpha	R.GVNWAAFHPT216MPLIVSGADDR.Q	216										outside
P55060	XPO2	HUMAN Exportin-2	K.EHDPVGQM920VNNPK.I	9620										outside
P61158	ARP3	HUMAN Actin-related protein 3	R.HNPVFGVM417S.-	417										outside
P61981	1433G	HUMAN 14-3-3 protein gamma	K.TAFDDAIAELDT210LNEDSYKDSTLIMQLLR.D	210										outside
P63261	ACTG	HUMAN Actin, cytoplasmic 2	M.EEEIAALVIDNGSGM16CK.A	16										outside
P68104	EF1A1	HUMAN Elongation factor 1-alpha 1	K.SGDAAIVDM404VPGKPMCVESFSDYPPLGR.F	404										outside
P78371	TCPB	HUMAN T-complex protein 1 subunit beta	R.AAHSEGNTTAGLDM480R.E	480										outside
Q00610	CLH1	HUMAN Clathrin heavy chain 1	R.RPISADSAIM73NPASK.V	73										outside
Q01844	EWS	HUMAN RNA-binding protein EWS	R.QDHPSSM275GVYGQESGGFSGPGENR.S	275										outside
Q07666	KHDR1	HUMAN KH domain-containing, RNA-binding, signal transduction-associated protein 1	R.SGSM21DPSGAHPSVR.Q	21										outside
Q08499	PDE4D	HUMAN cAMP-specific 3',5'-cyclic phosphodiesterase 4D	K.H663NASVEK.S	663										outside
Q15365	PCBP1	HUMAN Poly(rC)-binding protein 1	K.AFAMIIDKLEEDINSSM87TNSTAASRPPVTLR.L	87										outside
Q15436	SC23A	HUMAN Protein transport protein Sec23A	R.M34VVPVAALFTPLK.E	34										outside
Q10567	AP1B1	HUMAN AP-1 complex subunit beta-1	R.NSFGLAPATPLQVHAPLSPNQTVE792ISLPLSTVGSVMK.M	792										outside
Q13557	KCC2D	HUMAN Calcium/calmodulin-dependent protein kinase type II subunit delta	K.ICDPGLTAFEPEALGNLVEGM392DFHR.F	392										outside
Q14008	CKAP5	HUMAN Cytoskeleton-associated protein 5	R.SM1470SGHPEAAQMVR.R	1470										outside
Q7Z406	MYH14	HUMAN Myosin-14	R.NTDQATM391PDNTAAQK.L	391										outside
Q15149	PLEC	HUMAN Plectin	K.DLLPSDM3190AVALLEAQAGTGHIIDPATSAR.L	3190										outside
Q92597	NDRG1	HUMAN Protein NDRG1	K.SIIGM137GTGAGAYILTR.F	137										outside
Q96A33	CCD47	HUMAN Coiled-coil domain-containing protein 47	K.DM376EALLPLMNMVIYSIDK.A	376										outside
Q96CW1	AP2M1	HUMAN AP-2 complex subunit mu	K.WARPPISM388NFEVPFAPSGLK.V	388										outside
Q99714	HCD2	HUMAN 3-hydroxyacyl-CoA dehydrogenase type-2	R.LVAGEM136GQNEPDQGGQR.G	136										outside
Q8NBQ5	DHB11	HUMAN Estradiol 17-beta-dehydrogenase 11	K.M246IFIPSSIAFLTTLER.I	246										outside
Q9H0U4	RAB1B	HUMAN Ras-related protein Rab-1B	R.M173GPGAASGGERPNLK.I	173										outside
Q9P0L0	VAPA	HUMAN Vesicle-associated membrane protein-associated protein A	K.QDGPM159PKPHSVSLNDTETR.K	159										outside
Q9P2M7	CING	HUMAN Cingulin	R.SM527QDATQDHAVLEAER.Q	527										outside

## Sheet: Sheet2
Q9BRK5	CAB45	HUMAN 45 kDa calcium-binding protein	K.TAEHFQEAM139EESK.T	139	35-362	extracellular	0.88519		N-linked:40		35-362	extracellular	0.88516
Q9NQ84	GPC5C	HUMAN G-protein coupled receptor family C group 5 member C	R.AEDM413YSAQSHQAATPPKDGK.N	413	298-441	intracellular	0.00215		N-linkd:191		179-208	extracellular	0.999
Q6UWM9	UD2A3	HUMAN UDP-glucuronosyltransferase 2A3	R.TVITDSSYKENAM341R.L	341	30-490	extracellular	0.9879		O-linked:313		30-490	extracellular	0.9879
Q14697	GANAB	HUMAN Neutral alpha-glucosidase AB	R.WYQM666GAYQPFFR.A	666	33-944	extracellular	0.99971		N-linked:97		33-944	extracellular	0.99967
P49755	TMEDA	HUMAN Transmembrane emp24 domain-containing protein 10	R.RLEDLSESIVNDFAYM168KK.R	168	38-185	intracellular	0.00907		N-linked:179		38-185	intracellular	0.00907
P23284	PPIB	HUMAN Peptidyl-prolyl cis-trans isomerase B	K.HYGPGWVSM140ANAGK.D	140	34-216	extracellular	0.94237		N-linked:148		34-216	extracellular	0.94243
P35222	CTNB1	HUMAN Catenin beta-1	R.HQEAEM480AQNAVR.L	480		outside			O-linked:23			outside
P06576	ATPB	HUMAN ATP synthase subunit beta, mitochondrial	K.TVLIM217ELINNVAK.A	217		outside			O-linked:106			outside
P14923	PLAK	HUMAN Junction plakoglobin	R.ALM180GSPQLVAAVVR.T	180		outside			O-linked:14			outside
Q14980	NUMA1	HUMAN Nuclear mitotic apparatus protein 1	R.AALM989ESQGQQQEER.G	989		outside			O-linked:1844			outside
P61586	RHOA	HUMAN Transforming protein RhoA	K.M134KQEPVKPEEGR.D	134		outside			O-linked:34			outside
P62937	PPIA	HUMAN Peptidyl-prolyl cis-trans isomerase A	K.VKEGMNIVEAM142ER.F	142		outside			N-linked:108			outside
