# Supplementary material for: Identification of potential sialic acid binding proteins on cell membranes by proximity chemical labeling
Source: Royal Society of Chemistry journal article supplement (doi:10.1039/c9sc01360a), 2019-01-01
Supplement: c9sc01360a4.xlsx [file c9sc01360a4.xlsx]

## Sheet: A549 Cell Line
Protein ID	Protein Short Name	Protein Full Name	Oxidized peptides	Oxidation Sites	Amino Acid Region	Membrane Location	Probability	Glycopeptides	Glycosylation Sites	Glycans	Amino Acid Region	Membrane Location	Probability	TMHMM Results
O43570	CAH12	HUMAN Carbonic anhydrase 12	R.NPVQISQEQLLALETALY258CTHMDDPSPR.E	258	1-304	extracellular	0.96	K.KYPSCGGLLQSPIDLHSDILQYDASLTPLEFQGYN80LSANK.Q	80	Hex(5)HexNAc(4)Fuc(1)NeuAc(1)	1-304	extracellular	0.96	outside 1 304
			R.NPVQISQEQLLALETALYC259THMDDPSPR.E	259	1-304	extracellular	0.96			Hex(5)HexNAc(4)Fuc(1)NeuAc(2)				TMhelix 305 327
			R.NPVQISQEQLLALETALYCTH261MDDPSPR.E	261	1-304	extracellular	0.96			Hex(5)HexNAc(4)Fuc(3)NeuAc(1)				inside 328 354
										Hex(6)HexNAc(5)Fuc(1)NeuAc(2)
P05556	ITB1	HUMAN Integrin beta-1	R.HCECSTDEVNSEDM512DAYCR.K	512	1-728	extracellular	1	K.DTCTQECSYFN669ITK.V	669	Hex(6)HexNAc(2)Fuc(0)NeuAc(0)	1-728	extracellular	1	outside 1 728
										Hex(8)HexNAc(2)Fuc(0)NeuAc(0)
										Hex(9)HexNAc(2)Fuc(0)NeuAc(0)
										Hex(5)HexNAc(4)Fuc(1)NeuAc(1)
										Hex(5)HexNAc(4)Fuc(2)NeuAc(1)
										Hex(5)HexNAc(4)Fuc(1)NeuAc(2)
										Hex(5)HexNAc(4)Fuc(3)NeuAc(1)
										Hex(6)HexNAc(5)Fuc(1)NeuAc(1)
								K.EN520SSEICSNNGECVCGQCVCR.K	520	Hex(3)HexNAc(7)Fuc(0)NeuAc(0)	1-728	extracellular	1
										Hex(6)HexNAc(2)Fuc(0)NeuAc(0)
										Hex(7)HexNAc(2)Fuc(0)NeuAc(0)
										Hex(4)HexNAc(3)Fuc(0)NeuAc(1)
										Hex(8)HexNAc(2)Fuc(0)NeuAc(0)
										Hex(9)HexNAc(2)Fuc(0)NeuAc(0)
										Hex(6)HexNAc(3)Fuc(0)NeuAc(0)
										Hex(3)HexNAc(4)Fuc(3)NeuAc(0)
										Hex(3)HexNAc(6)Fuc(1)NeuAc(0)
										Hex(4)HexNAc(6)Fuc(1)NeuAc(0)
										Hex(3)HexNAc(7)Fuc(1)NeuAc(0)				TMhelix 729 751
										Hex(7)HexNAc(6)Fuc(4)NeuAc(1)
										Hex(7)HexNAc(6)Fuc(1)NeuAc(1)
										Hex(7)HexNAc(6)Fuc(1)NeuAc(2)
										Hex(7)HexNAc(6)Fuc(1)NeuAc(3)
								K.NGVN406GTGENGR.K	406	Hex(7)HexNAc(2)Fuc(0)NeuAc(0)	1-728	extracellular	1
										Hex(8)HexNAc(2)Fuc(0)NeuAc(0)
										Hex(9)HexNAc(2)Fuc(0)NeuAc(0)
										Hex(5)HexNAc(4)Fuc(1)NeuAc(0)
										Hex(5)HexNAc(4)Fuc(1)NeuAc(1)
								K.SCGECIQAGPNCGWCTN50STFLQEGMPTSAR.C	50	Hex(6)HexNAc(2)Fuc(0)NeuAc(0)	1-728	extracellular	1
										Hex(7)HexNAc(2)Fuc(0)NeuAc(0)
										Hex(8)HexNAc(2)Fuc(0)NeuAc(0)
										Hex(3)HexNAc(6)Fuc(0)NeuAc(0)
										Hex(9)HexNAc(2)Fuc(0)NeuAc(0)				inside 752 798
										Hex(3)HexNAc(4)Fuc(3)NeuAc(0)
										Hex(4)HexNAc(4)Fuc(1)NeuAc(1)
										Hex(5)HexNAc(4)Fuc(2)NeuAc(0)
										Hex(5)HexNAc(4)Fuc(4)NeuAc(0)
								R.NPCTSEQN212CTSPFSYK.N	212	Hex(6)HexNAc(2)Fuc(0)NeuAc(0)	1-728	extracellular	1
										Hex(7)HexNAc(2)Fuc(0)NeuAc(0)
										Hex(8)HexNAc(2)Fuc(0)NeuAc(0)
										Hex(9)HexNAc(2)Fuc(0)NeuAc(0)
										Hex(10)HexNAc(2)Fuc(0)NeuAc(0)
										Hex(5)HexNAc(4)Fuc(1)NeuAc(1)
										Hex(6)HexNAc(5)Fuc(1)NeuAc(0)
										Hex(5)HexNAc(4)Fuc(1)NeuAc(2)
										Hex(5)HexNAc(4)Fuc(3)NeuAc(1)
										Hex(6)HexNAc(5)Fuc(1)NeuAc(1)
										Hex(6)HexNAc(5)Fuc(3)NeuAc(0)
										Hex(7)HexNAc(6)Fuc(1)NeuAc(0)
										Hex(6)HexNAc(5)Fuc(3)NeuAc(1)
										Hex(7)HexNAc(6)Fuc(1)NeuAc(1)
										Hex(7)HexNAc(6)Fuc(1)NeuAc(3)
										Hex(4)HexNAc(4)Fuc(2)NeuAc(1)
P08195	4F2	HUMAN 4F2 cell-surface antigen heavy chain	-.M1ELQPPEASIAVVSIPR.Q	1	1-182	intracellular	0.86	R.DIENLKDASSFLAEWQN365ITK.G	365	Hex(8)HexNAc(2)Fuc(0)NeuAc(0)	206-630	extracellular	0.89	inside 1 182
										Hex(9)HexNAc(2)Fuc(0)NeuAc(0)
			K.EVELNELEPEKQPMNAASGAAM133SLAGAEK.N	133	1-182	intracellular	0.86			Hex(8)HexNAc(7)Fuc(0)NeuAc(1)
										Hex(5)HexNAc(4)Fuc(1)NeuAc(1)
										Hex(6)HexNAc(5)Fuc(1)NeuAc(0)
										Hex(6)HexNAc(5)Fuc(1)NeuAc(1)
										Hex(6)HexNAc(5)Fuc(1)NeuAc(2)
										Hex(6)HexNAc(5)Fuc(3)NeuAc(1)
										Hex(7)HexNAc(6)Fuc(1)NeuAc(1)
										Hex(6)HexNAc(5)Fuc(1)NeuAc(3)
										Hex(8)HexNAc(7)Fuc(1)NeuAc(1)
										Hex(5)HexNAc(4)Fuc(1)NeuAc(0)
										Hex(5)HexNAc(4)Fuc(1)NeuAc(2)
										Hex(6)HexNAc(5)Fuc(3)NeuAc(0)
										Hex(7)HexNAc(6)Fuc(1)NeuAc(0)
										Hex(5)HexNAc(6)Fuc(1)NeuAc(2)
										Hex(8)HexNAc(7)Fuc(1)NeuAc(0)
										Hex(7)HexNAc(6)Fuc(1)NeuAc(2)				TMhelix 183 205
										Hex(7)HexNAc(6)Fuc(4)NeuAc(1)
										Hex(9)HexNAc(8)Fuc(1)NeuAc(0)
										Hex(7)HexNAc(6)Fuc(1)NeuAc(3)
										Hex(8)HexNAc(7)Fuc(1)NeuAc(2)
										Hex(7)HexNAc(6)Fuc(1)NeuAc(4)
								R.LLIAGTN381SSDLQQILSLLESNK.D	381	Hex(4)HexNAc(5)Fuc(0)NeuAc(1)	206-630	extracellular	0.89
			R.GENSW318FSTQVDTVATK.V	318	206-630	intracellular	0.86			Hex(6)HexNAc(5)Fuc(0)NeuAc(0)
										Hex(6)HexNAc(5)Fuc(0)NeuAc(1)
										Hex(7)HexNAc(6)Fuc(0)NeuAc(1)
										Hex(7)HexNAc(6)Fuc(0)NeuAc(0)
										Hex(6)HexNAc(5)Fuc(0)NeuAc(2)
										Hex(9)HexNAc(6)Fuc(0)NeuAc(0)
										Hex(6)HexNAc(5)Fuc(0)NeuAc(3)				outside 206 630
										Hex(7)HexNAc(6)Fuc(0)NeuAc(2)
										Hex(8)HexNAc(7)Fuc(0)NeuAc(1)
										Hex(7)HexNAc(6)Fuc(0)NeuAc(3)
										Hex(7)HexNAc(6)Fuc(0)NeuAc(4)
										Hex(4)HexNAc(4)Fuc(1)NeuAc(1)
										Hex(6)HexNAc(6)Fuc(1)NeuAc(1)
										Hex(6)HexNAc(5)Fuc(2)NeuAc(0)
										Hex(7)HexNAc(5)Fuc(1)NeuAc(0)
										Hex(5)HexNAc(4)Fuc(3)NeuAc(1)
										Hex(6)HexNAc(5)Fuc(2)NeuAc(1)
										Hex(7)HexNAc(5)Fuc(1)NeuAc(1)
										Hex(7)HexNAc(7)Fuc(1)NeuAc(0)
										Hex(6)HexNAc(5)Fuc(3)NeuAc(1)
										Hex(7)HexNAc(5)Fuc(1)NeuAc(2)
										Hex(7)HexNAc(6)Fuc(4)NeuAc(0)
										Hex(8)HexNAc(6)Fuc(1)NeuAc(1)
										Hex(6)HexNAc(5)Fuc(1)NeuAc(3)
										Hex(6)HexNAc(6)Fuc(1)NeuAc(3)
										Hex(7)HexNAc(6)Fuc(4)NeuAc(1)
										Hex(7)HexNAc(7)Fuc(1)NeuAc(2)
										Hex(7)HexNAc(6)Fuc(1)NeuAc(3)
										Hex(7)HexNAc(6)Fuc(1)NeuAc(4)
P15144	AMPN	HUMAN Aminopeptidase N	R.KVVATTQM212QAADAR.K	212	35-967	extracellular	1	K.AEFN234ITLIHPK.D	234	Hex(8)HexNAc(2)Fuc(0)NeuAc(0)	35-967	extracellular	1	inside 1 11
										Hex(5)HexNAc(4)Fuc(0)NeuAc(1)
			R.QYM693PWEAALSSLSYFK.L	693	35-967	extracellular	1	K.GPSTPLPEDPNWN265VTEFHTTPK.M	265	Hex(6)HexNAc(2)Fuc(0)NeuAc(0)	35-967	extracellular	1
										Hex(9)HexNAc(2)Fuc(0)NeuAc(0)
										Hex(5)HexNAc(4)Fuc(0)NeuAc(1)
										Hex(6)HexNAc(5)Fuc(0)NeuAc(0)
										Hex(5)HexNAc(4)Fuc(0)NeuAc(2)
										Hex(6)HexNAc(5)Fuc(0)NeuAc(1)
										Hex(6)HexNAc(5)Fuc(0)NeuAc(2)				TMhelix 12 34
										Hex(6)HexNAc(5)Fuc(0)NeuAc(3)
										Hex(7)HexNAc(6)Fuc(0)NeuAc(2)
										Hex(7)HexNAc(6)Fuc(0)NeuAc(3)
										Hex(7)HexNAc(6)Fuc(0)NeuAc(4)
										Hex(5)HexNAc(4)Fuc(2)NeuAc(1)
										Hex(6)HexNAc(5)Fuc(2)NeuAc(0)
										Hex(7)HexNAc(5)Fuc(1)NeuAc(1)
										Hex(7)HexNAc(5)Fuc(1)NeuAc(2)
										Hex(7)HexNAc(6)Fuc(4)NeuAc(0)				outside 35 967
			R.VM444AVDALASSHPLSTPASEINTPAQISELFDAISYSK.G	444	35-967	extracellular	1	K.VPVTLALN681NTLFLIEER.Q	681	Hex(5)HexNAc(4)Fuc(0)NeuAc(1)	35-967	extracellular	1
										Hex(5)HexNAc(4)Fuc(0)NeuAc(2)
										Hex(6)HexNAc(5)Fuc(0)NeuAc(1)
										Hex(6)HexNAc(5)Fuc(0)NeuAc(2)
										Hex(6)HexNAc(4)Fuc(1)NeuAc(0)
										Hex(5)HexNAc(4)Fuc(2)NeuAc(1)
										Hex(6)HexNAc(4)Fuc(3)NeuAc(0)
										Hex(6)HexNAc(5)Fuc(2)NeuAc(0)
										Hex(7)HexNAc(5)Fuc(1)NeuAc(0)
								R.N818ATLVNEADKLR.A	818	Hex(7)HexNAc(6)Fuc(0)NeuAc(1)	35-967	extracellular	1
P16070	CD44	HUMAN CD44 antigen	K.ESSETPDQFM725TADETR.N	725	673-742	intracellular	1	K.AFN57STLPTMAQMEK.A	57	Hex(5)HexNAc(4)Fuc(0)NeuAc(2)	1-649	extracellular	1	outside 1 649
			K.ESSETP721DQFMTADETR.N	721	673-742	intracellular	1			Hex(7)HexNAc(6)Fuc(0)NeuAc(0)
										Hex(6)HexNAc(5)Fuc(0)NeuAc(2)
										Hex(5)HexNAc(4)Fuc(1)NeuAc(2)				TMhelix 650 672
										Hex(6)HexNAc(5)Fuc(1)NeuAc(2)
										Hex(6)HexNAc(5)Fuc(3)NeuAc(1)				inside 673 742
										Hex(6)HexNAc(5)Fuc(1)NeuAc(3)
P18462	1A25	HUMAN HLA class I histocompatibility antigen, A-25 alpha chain	R.KGGSYSQAASSDSAQGSDM358SLTACKV.-	358	331-365	intracellular	1	R.YYN110QSEDGSHTIQR.M	110	Hex(5)HexNAc(4)Fuc(1)NeuAc(1)	1-307	extracellular	1	outside 1 307
										Hex(5)HexNAc(4)Fuc(1)NeuAc(2)				TMhelix 308 330
														inside 331 365
P35613	BASI	HUMAN Basigin	K.SSEHINEGETAM239LVCK.S	239	28-322	extracellular	0.89	K.ILLTCSLN160DSATEVTGHR.W	160	Hex(8)HexNAc(2)Fuc(0)NeuAc(0)	28-322	extracellular	0.89	inside 1 4
										Hex(9)HexNAc(2)Fuc(0)NeuAc(0)				TMhelix 5 27
										Hex(5)HexNAc(4)Fuc(1)NeuAc(1)				outside 28 322
										Hex(5)HexNAc(4)Fuc(3)NeuAc(0)				TMhelix 323 345
										Hex(5)HexNAc(4)Fuc(1)NeuAc(2)				inside 346 385
										Hex(6)HexNAc(5)Fuc(1)NeuAc(2)
Q12797	ASPH	HUMAN Aspartyl/asparaginyl beta-hydroxylase	R.SELHIENLNM292EADPGQYR.C	292	76-758	extracellular	1	K.SSGN12SSSSGSGSGSTSAGSSSPGAR.R	12	Hex(9)HexNAc(2)Fuc(0)NeuAc(0)	1-52	intracellular	1	inside 1 52
			K.YSIM670HPGTHVWPHTGPTNCR.L	670	76-758	extracellular	1			Hex(10)HexNAc(2)Fuc(0)NeuAc(0)
			K.EGIESGDP520GTDDGR.F	520	76-758	extracellular	1			Hex(5)HexNAc(4)Fuc(0)NeuAc(2)
										Hex(4)HexNAc(5)Fuc(0)NeuAc(2)				TMhelix 53 75
										Hex(5)HexNAc(5)Fuc(0)NeuAc(2)
										Hex(4)HexNAc(4)Fuc(2)NeuAc(1)
										Hex(5)HexNAc(4)Fuc(1)NeuAc(1)				outside 76 758
										Hex(5)HexNAc(4)Fuc(1)NeuAc(2)
										Hex(6)HexNAc(5)Fuc(1)NeuAc(1)
Q13740	CD166	HUMAN CD166 antigen	K.ADIQM216PFTCSVTYYGPSGQK.T	216	1-527	extracellular	1	K.IIISPEEN480VTLTCTAENQLER.T	480	Hex(6)HexNAc(2)Fuc(0)NeuAc(0)	1-527	extracellular	1	outside 1 527
										Hex(7)HexNAc(2)Fuc(0)NeuAc(0)
										Hex(6)HexNAc(3)Fuc(0)NeuAc(0)
										Hex(5)HexNAc(4)Fuc(0)NeuAc(0)
										Hex(8)HexNAc(2)Fuc(0)NeuAc(0)
										Hex(5)HexNAc(3)Fuc(0)NeuAc(1)
										Hex(9)HexNAc(2)Fuc(0)NeuAc(0)
										Hex(6)HexNAc(3)Fuc(0)NeuAc(1)
										Hex(5)HexNAc(4)Fuc(0)NeuAc(1)
										Hex(5)HexNAc(4)Fuc(1)NeuAc(0)
										Hex(5)HexNAc(4)Fuc(1)NeuAc(1)
								K.LGDCISEDSYPDGN167ITWYR.N	167	Hex(5)HexNAc(4)Fuc(0)NeuAc(1)	1-527	extracellular	1	TMhelix 528 550
										Hex(7)HexNAc(2)Fuc(0)NeuAc(0)
										Hex(5)HexNAc(4)Fuc(0)NeuAc(0)
										Hex(7)HexNAc(6)Fuc(0)NeuAc(0)
										Hex(5)HexNAc(4)Fuc(1)NeuAc(0)
										Hex(5)HexNAc(4)Fuc(1)NeuAc(1)
										Hex(5)HexNAc(4)Fuc(2)NeuAc(0)
										Hex(5)HexNAc(4)Fuc(3)NeuAc(0)
										Hex(6)HexNAc(4)Fuc(2)NeuAc(0)
										Hex(5)HexNAc(4)Fuc(1)NeuAc(2)
										Hex(5)HexNAc(4)Fuc(3)NeuAc(1)
								K.NAIKEGDN265ITLK.C	265	Hex(6)HexNAc(5)Fuc(1)NeuAc(1)	1-527	extracellular	1	inside 551 583
										Hex(6)HexNAc(5)Fuc(1)NeuAc(2)
										Hex(7)HexNAc(6)Fuc(1)NeuAc(1)
										Hex(6)HexNAc(5)Fuc(1)NeuAc(3)
										Hex(7)HexNAc(6)Fuc(1)NeuAc(2)
			R.FVC113MLVTEDNVFEAPTIVK.V	113	1-527	extracellular	1	K.TIICHVEGFPKPAIQWTITGSGSVIN457QTEESPYINGR.Y	457	Hex(5)HexNAc(4)Fuc(1)NeuAc(1)	1-527	extracellular	1
								R.LN91LSEN95YTLSISNAR.I	95	Hex(7)HexNAc(6)Fuc(0)NeuAc(0)	1-527	extracellular	1
										Hex(5)HexNAc(4)Fuc(1)NeuAc(2)
										Hex(5)HexNAc(4)Fuc(3)NeuAc(1)
								R.N306ATGDYK.C	306	Hex(9)HexNAc(2)Fuc(0)NeuAc(0)	1-527	extracellular	1
										Hex(5)HexNAc(4)Fuc(1)NeuAc(0)
										Hex(5)HexNAc(4)Fuc(2)NeuAc(0)
										Hex(5)HexNAc(4)Fuc(1)NeuAc(1)
										Hex(5)HexNAc(4)Fuc(1)NeuAc(2)
										Hex(6)HexNAc(5)Fuc(1)NeuAc(1)
										Hex(6)HexNAc(5)Fuc(1)NeuAc(2)
										Hex(7)HexNAc(6)Fuc(1)NeuAc(1)
										Hex(7)HexNAc(6)Fuc(1)NeuAc(2)
P04844	RPN2	HUMAN Dolichyl-diphosphooligosaccharide--protein glycosyltransferase subunit 2	K.TSFTPVGDVFELNFM337NVK.F	337	30-538	extracellular	0.92	R.SNLDPSNVDSLFYAAQASQALSGCEISISN106ETK.D	106	Hex(6)HexNAc(2)Fuc(0)NeuAc(0)	30-538	extracellular	0.92	inside 1 6
														TMhelix 7 29
														outside 30 538
														TMhelix 539 561
														inside 562 572
										Hex(8)HexNAc(2)Fuc(0)NeuAc(0)				TMhelix 573 595
														outside 596 604
														TMhelix 605 622
														inside 623 631
P18084	ITB5	HUMAN Integrin beta-5	R.GHCLCGQCQCTEPGAFGEM624CEK.C	624	1-719	extracellular	1	K.CHAGYIGDNCN586CSTDISTCR.G	586	Hex(8)HexNAc(2)Fuc(0)NeuAc(0)	1-719	extracellular	1	outside 1 719
														TMhelix 720 742
														inside 743 799
O15031	PLXB2	HUMAN Plexin-B2	K.SCVAVTSAQP526QNMSR.R	526		outside		R.SIN1002VTGQGFSLIQR.F	1002	Hex(8)HexNAc(2)Fuc(0)NeuAc(0)		outside
										Hex(9)HexNAc(2)Fuc(0)NeuAc(0)
								R.TEAGAFEYVPDPTFEN1099FTGGVK.K	1099	Hex(5)HexNAc(4)Fuc(1)NeuAc(0)		outside
P02786	TFR1	HUMAN Transferrin receptor protein 1	K.LFGNM349EGDCPSDWK.T	349	87-760	extracellular	1	K.KDFEDLYTPVN251GSIVIVR.A	251	Hex(9)HexNAc(2)Fuc(0)NeuAc(0)	87-760	extracellular	0.96	inside 1 63
														TMhelix 64 86
														outside 87 760
P06213	INSR	HUMAN Insulin receptor	R.W516EPYWPPDFR.D	516	32-956	extracellular	0.99		N-linked: 43		32-956	extracellular	0.99	inside 1 8
									N-linked: 52
									N-linked: 105
									N-linked: 138					TMhelix 9 31
									N-linked: 242
									N-linked: 282
									N-linked: 322					outside 32 956
									N-linked: 364
									N-linked: 424
									N-linked: 445
									N-linked: 541					TMhelix 957 979
									N-linked: 633
									N-linked: 651
									N-linked: 698					inside 980 1382
									N-linked: 769
									N-linked: 782
									N-linked: 920
									N-linked: 933
P04156	PRIO	HUMAN Major prion protein	R.VVEQM213CITQYER.E	213	135-229	intracellular	0.73		N-linked: 181		135-229	intracellular	0.73	outside 1 111
														TMhelix 112 134
									N-linked: 197		135-229	intracellular	0.73	inside 135 229
														TMhelix 230 252
														outside 253 253
Q8TCT9	HM13	HUMAN Minor histocompatibility antigen H13	K.GEVTEM343FSYEESNPKDPAAVTESK.E	343	337-377	intracellular	0.958		N-linked: 10		1-31	extracellular	0.884	outside 1 31
														TMhelix 32 54
														inside 55 74
														TMhelix 75 97
														outside 98 106
														TMhelix 107 129
														inside 130 209
									N-linked: 20		1-31	extracellular	0.884	TMhelix 210 232
														outside 233 257
														TMhelix 258 277
														inside 278 289
														TMhelix 290 312
														outside 313 316
														TMhelix 317 336
														inside 337 377
Q15758	AAAT	HUMAN Neutral amino acid transporter B(0)	R.GPAGDATVASEKESVM541.-	541	437-541	extracellular	0.783		N-linked: 163		153-227	extracellular	0.954	inside 1 52
														TMhelix 53 75
														outside 76 94
														TMhelix 95 117
														inside 118 129
														TMhelix 130 152
														outside 153 227
														TMhelix 228 245
														inside 246 264
														TMhelix 265 287
									N-linked: 212		153-227	extracellular	0.954	outside 288 301
														TMhelix 302 324
														inside 325 336
														TMhelix 337 359
														outside 360 378
														TMhelix 379 401
														inside 402 413
														TMhelix 414 436
														outside 437 541
P33527	MRP1	HUMAN Multidrug resistance-associated protein 1	K.QM896ENGMLVTDSAGK.Q	896	614-968	intracellular	0.88		N-linked: 19		1-35	extracellular	0.962	outside 1 35
														TMhelix 36 58
														inside 59 74
														TMhelix 75 92
														outside 93 101
														TMhelix 102 124
														inside 125 130
														TMhelix 131 153
														outside 154 172
														TMhelix 173 192
														inside 193 320
														TMhelix 321 343
														outside 344 362
									N-linked: 23		1-35	extracellular	0.962	TMhelix 363 385
														inside 386 436
														TMhelix 437 459
														outside 460 462
														TMhelix 463 485
														inside 486 548
														TMhelix 549 571
														outside 572 590
														TMhelix 591 613
														inside 614 968
														TMhelix 969 991
									N-linked: 1006		992-1021	extracellular	0.88	outside 992 1021
														TMhelix 1022 1044
														inside 1045 1096
														TMhelix 1097 1119
														outside 1120 1197
														TMhelix 1198 1220
														inside 1221 1224
														TMhelix 1225 1247
														outside 1248 1531
P16188	1A30	HUMAN HLA class I histocompatibility antigen, A-30 alpha chain	R.SWTAADM162AAQITQR.K	162	1-307	extracellular	1		N-linked: 110		1-307	extracellular	1	outside 1 307
														TMhelix 308 330
														inside 331 365
P11166	GTR1	HUMAN Solute carrier family 2, facilitated glucose transporter member 1	R.GTADVTHDLQEM244KEESR.Q	244	208-271	intracellular	0.926		N-linked: 45		35-64	extracellular	95.5	inside 1 11
														TMhelix 12 34
														outside 35 64
														TMhelix 65 87
														inside 88 93
														TMhelix 94 112
														outside 113 121
														TMhelix 122 144
														inside 145 155
														TMhelix 156 175
														outside 176 184
														TMhelix 185 207
														inside 208 271
														TMhelix 272 291
														outside 292 305
														TMhelix 306 328
														inside 329 334
														TMhelix 335 357
														outside 358 366
														TMhelix 367 389
														inside 390 401
														TMhelix 402 424
														outside 425 427
														TMhelix 428 450
														inside 451 492
P30447	1A23	HUMAN HLA class I histocompatibility antigen, A-23 alpha chain	R.KGGSYSQAASSDSAQGSDVSLTAC363KV.-	363	331-365	intracellular	0.983		N-linked: 110		1-307	extracellular	0.99	outside 1 307
														TMhelix 308 330
														inside 331 365
Q9BVG9	PTSS2	HUMAN Phosphatidylserine synthase 2	K.TLEWLSLKTYKWQGLW279NIPTYK.G	279	145-314	intracellular	0.877		N-linked: 181		145-314	intracellular	0.877	outside 1 59
														TMhelix 60 82
														inside 83 94
														TMhelix 95 112
														outside 113 121
														TMhelix 122 144
														inside 145 314
														TMhelix 315 334
														outside 335 343
														TMhelix 344 366
														inside 367 377
														TMhelix 378 395
														outside 396 409
														TMhelix 410 432
														inside 433 487
P08670	VIME	HUMAN Vimentin	K.LQEEM193LQREEAENTLQSFR.Q	193					O-linked: 7					outside
									O-linked: 33
									O-linked: 34
P06576	ATPB	HUMAN ATP synthase subunit beta, mitochondrial	K.VALVY269GQMNEPPGAR.A	269					O-linked: 106					outside
P25705	ATPA	HUMAN ATP synthase subunit alpha, mitochondrial	K.TGTAEM51SSILEER.I	51					O-linked: 76					outside
P61586	RHOA	HUMAN Transforming protein RhoA	K.M134KQEPVKPEEGR.D	134					O-linked: 34					outside
P63000	RAC1	HUMAN Ras-related C3 botulinum toxin substrate 1	K.LTPITYP140QGLAMAK.E	140					O-linked: 32					outside
Q01082	SPTB2	HUMAN Spectrin beta chain, non-erythrocytic 1	R.TQTAIASEDM1090PNTLTEAEK.L	1090					O-linked: 2324					outside
Q14980	NUMA1	HUMAN Nuclear mitotic apparatus protein 1	R.AALM989ESQGQQQEER.G	989					O-linked: 1844					outside
Q96A33	CCD47	HUMAN Coiled-coil domain-containing protein 47	R.IM445NEEDPEKQR.R	445					O-linked: 178					outside
P05141	ADT2	HUMAN ADP/ATP translocase 2	K.GM201LPDPK.N	201	195-208	extracellular	0.99							outside 1 108
														TMhelix 109 131
														inside 132 171
														TMhelix 172 194
			K.GTDIM250YTGTLDCWR.K	250	232-298	intracellular	0.99							outside 195 208
														TMhelix 209 231
														inside 232 298
Q9P0L0	VAPA	HUMAN Vesicle-associated membrane protein-associated protein A	K.QDGPM159PKPHSVSLNDTETR.K	159	1-225	extracellular	0.609							outside 1 225
			R.CVFEM132PNENDKLNDMEPSK.A	132	1-225	extracellular	0.609							TMhelix 226 248
			R.CVFEMPNENDKLNDM142EPSK.A	142	1-225	extracellular	0.609							inside 249 249
P27105	STOM	HUMAN Erythrocyte band 7 integral membrane protein	K.EASM239VITESPAALQLR.Y	239	55-288	intracellular	0.373							outside 1 31
			K.NSTIVFPLP272IDMLQGIIGAK.H	272	55-288	intracellular	0.37							TMhelix 32 54
														inside 55 288
Q9NZM1	MYOF	HUMAN Myoferlin	K.M1080APSETHGAAAIFK.L	1080	1-2025	extracellular	0.99							outside 1 2025
			K.NFQM1321ASITSPSLVVECGGER.V	1321	1-2025	extracellular	0.99
			R.AEDIPQM373DDAFSQTVK.E	373	1-2025	extracellular	0.99							TMhelix 2026 2048
			R.AEDIP371QMDDAFSQTVK.E	371	1-2025	extracellular	0.99
			R.DIVIEM1432EDTKPLLASK.L	1432	1-2025	extracellular	0.99							inside 2049 2061
			R.MY1606ELSCYLPQEK.D	1606	1-2025	extracellular	0.99
Q99805	TM9S2	HUMAN Transmembrane 9 superfamily member 2	R.Y333NQMDSTEDAQEEFGWK.L	333	1-300	extracellular	0.974							outside 1 300
														TMhelix 301 323
														inside 324 363
														TMhelix 364 386
														outside 387 395
														TMhelix 396 418
														inside 419 433
			R.YNQM336DSTEDAQEEFGWK.L	336	1-300	extracellular	0.974							TMhelix 434 456
														outside 457 470
														TMhelix 471 493
														inside 494 519
														TMhelix 520 542
														outside 543 556
			K.IYYHVVETGSM226GAR.L	226	1-300	extracellular	0.974							TMhelix 557 579
														inside 580 591
														TMhelix 592 611
														outside 612 630
														TMhelix 631 653
														inside 654 663
P10620	MGST1	HUMAN Microsomal glutathione S-transferase 1	K.M27MLMSTATAFYR.L	27	15-37	TMH	0.99							outside 1 14
			K.MM28LMSTATAFYR.L	28	15-37	TMH	0.99							TMhelix 15 37
														inside 38 155
Q07065	CKAP4	HUMAN Cytoskeleton-associated protein 4	R.LQHVEDGVLSM423QVASAR.Q	423	132-602	extracellular	0.998							inside 1 108
														TMhelix 109 131
														outside 132 602
Q14573	ITPR3	HUMAN Inositol 1,4,5-trisphosphate receptor type 3	R.AM2608SLVSNEGEGEQNEIR.I	2608	2521-2671	intracellular	0.461							outside 1 2200
														TMhelix 2201 2223
														inside 2224 2235
														TMhelix 2236 2255
														outside 2256 2264
														TMhelix 2265 2287
														inside 2288 2293
														TMhelix 2294 2311
														outside 2312 2325
														TMhelix 2326 2348
														inside 2349 2368
														TMhelix 2369 2391
														outside 2392 2497
														TMhelix 2498 2520
														inside 2521 2671
O15126	SCAM1	HUMAN Secretory carrier-associated membrane protein 1	K.AQQEFATGVM308SNK.T	308	281-338	intracellular	0.994							inside 1 153
														TMhelix 154 176
														outside 177 180
														TMhelix 181 203
														inside 204 215
														TMhelix 216 238
														outside 239 257
														TMhelix 258 280
														inside 281 338
P51572	BAP31	HUMAN B-cell receptor-associated protein 31	K.LQAAVDGPM241DKKEE.-	241	122-246	extracellular	0.79							inside 1 6
														TMhelix 7 29
														outside 30 43
														TMhelix 44 63
														inside 64 101
														TMhelix 102 121
														outside 122 246
A1L0T0	ILVBL	HUMAN Acetolactate synthase-like protein	K.NAQM138AQSPILLLGGAASTLLQNR.G	138	35-632	extracellular	0.99							inside 1 11
														TMhelix 12 34
														outside 35 632
Q15836	VAMP3	HUMAN Vesicle-associated membrane protein 3	R.LQQTQNQVDEVVDIM29R.V	29	1-78	intracellular	0.927							inside 1 78
														TMhelix 79 98
														outside 99 100
Q9BSJ8	ESYT1	HUMAN Extended synaptotagmin-1	K.IVAQVWP151FLGQYMEK.L	151	91-240	intracellular	0.8							outside 1 67
														TMhelix 68 90
														inside 91 240
														TMhelix 241 263
														outside 264 1104
Q96S97	MYADM	HUMAN Myeloid-associated differentiation marker	R.TTITTTTTSSSGLGSP23MIVGSPR.A	23	1-36	intracellular	0.95							inside 1 35
														TMhelix 36 58
														outside 59 67
														TMhelix 68 90
														inside 91 102
														TMhelix 103 125
														outside 126 134
														TMhelix 135 157
														inside 158 169
														TMhelix 170 192
														outside 193 206
														TMhelix 207 226
														inside 227 238
														TMhelix 239 261
														outside 262 297
														TMhelix 298 320
														inside 321 322
Q9HBL7	PLRKT	HUMAN Plasminogen receptor (KT)	R.M106KGEAEDILETEK.S	106	73-147	extracellular	0.522							inside 1 52
														TMhelix 53 72
														outside 73 147
O15260	SURF4	HUMAN Surfeit locus protein 4	M.GQNDLM7GTAEDFADQFLR.V	7	1-62	extracellular	0.625							outside 1 62
														TMhelix 63 85
														inside 86 91
														TMhelix 92 114
														outside 115 176
														TMhelix 177 199
														inside 200 205
														TMhelix 206 225
														outside 226 239
														TMhelix 240 262
														inside 263 269
P14209	CD99	HUMAN CD99 antigen	K.ENAEQGEVDM166ESHR.N	166	149-185	intracellular	0.99							inside 1 6
														TMhelix 7 26
														outside 27 125
														TMhelix 126 148
														inside 149 185
P20020	AT2B1	HUMAN Plasma membrane calcium-transporting ATPase 1	R.HLDACETM466GNATAICSDK.T	466	442-854	extracellular	0.52							outside 1 376
														TMhelix 377 399
														inside 400 418
														TMhelix 419 441
														outside 442 854
														TMhelix 855 877
														inside 878 930
														TMhelix 931 950
														outside 951 969
														TMhelix 970 989
														inside 990 1001
														TMhelix 1002 1024
														outside 1025 1038
														TMhelix 1039 1061
														inside 1062 1220
P08238	HS90B	HUMAN Heat shock protein HSP 90-beta	R.YHTSQSGDEM466TSLSEYVSR.M	466										outside
			K.LGLGIDEDEVAAEEP700NAAVPDEIPPLEGDEDASRMEEVD.-	700
			R.VFIM363DSCDELIPEYLNFIR.G	363
P08670	VIME	HUMAN Vimentin	R.EM347EENFAVEAANYQDTIGR.L	347										outside
			R.LQDEIQNM372KEEMAR.H	372
			R.LQDEIQNMKEEM376AR.H	376
			R.M14FGGPGTASRPSSSR.S	14
			R.VEVERDNLAEDIM183R.L	183
			R.SLY53ASSPGGVYATR.S	53
			R.SLYASSP57GGVYATR.S	57
			R.SLYASSPGGVY61ATR.S	61
P11021	GRP78	HUMAN 78 kDa glucose-regulated protein	K.TFAPEEISAM148VLTK.M	148										outside
			R.TW103NDPSVQQDIK.F	103
P06576	ATPB	HUMAN ATP synthase subunit beta, mitochondrial	K.VALVYGQM272NEPPGAR.A	272										outside
			R.IM145NVIGEPIDER.G	145
			K.GFQQILAGEY499DHLPEQAFYMVGPIEEAVAK.A	499
P18206	VINC	HUMAN Vinculin	K.LVQAAQM94LQSDPYSVPAR.D	94										outside
			K.M327LGQMTDQVADLR.A	327
P20340	RAB6A	HUMAN Ras-related protein Rab-6A	R.VAAALP175GMESTQDR.S	175										outside
			R.VAAALPGM177ESTQDR.S	177
P26641	EF1G	HUMAN Elongation factor 1-gamma	K.KAAAPAPEEEM263DECEQALAAEPK.A	263										outside
			K.KAAAPAP259EEEMDECEQALAAEPK.A	259
P49327	FAS	HUMAN Fatty acid synthase	R.GNAGQSNYGFANSAM2041ER.I	204										outside
			K.ACLDTAVENM1235PSLK.M	1235
P63261	ACTG	HUMAN Actin, cytoplasmic 2	R.CPEALFQP264SFLGMESCGIHETTFNSIMK.C	264										outside
			R.CPEALFQPSFLGMESCGIHETTFNSIM283K.C	283
			R.TTGIVM153DSGDGVTHTVPIYEGYALPHAILR.L	153
			R.TTGIVMDSGDGVTH161TVPIYEGYALPHAILR.L	161
			R.TTGIVMDSGDGVTHTVPIY166EGYALPHAILR.L	166
P68104	EF1A1	HUMAN Elongation factor 1-alpha 1	K.SGDAAIVDM404VPGKPMCVESFSDYPPLGR.F	404										outside
			K.SGDAAIVDMVPGKP409MCVESFSDYPPLGR.F	409
			K.SGDAAIVDMVPGKPMC411VESFSDYPPLGR.F	41
			R.VETGVLKP274GMVVTFAPVNVTTEVK.S	274
			R.VETGVLKPGM276VVTFAPVNVTTEVK.S	276
			K.IGYNPDTVAFVPISGW196NGDNMLEPSANMPWFK.G	196
			K.IGYNPDTVAFVPISGWNGDNM201LEPSANMPWFK.G	201
			K.IGYNPDTVAFVPISGWNGDNMLEP204SANMPWFK.G	204
			K.IGYNPDTVAFVPISGWNGDNMLEPSANM208PWFK.G	208
Q00610	CLH1	HUMAN Clathrin heavy chain 1	R.RPISADSAIM73NPASK.V	73										outside
			K.AFM996TADLPNELIELLEK.I	996
Q01082	SPTB2	HUMAN Spectrin beta chain, non-erythrocytic 1	R.FESLEPEM898NNQASR.V	898										outside
			R.TQETPSAQM2200EGFLNR.K	2200
P04899	GNAI2	HUMAN Guanine nucleotide-binding protein G(i) subunit alpha-2	R.AVVYSNTIQSIM82AIVK.A	82										outside
P07900	HS90A	HUMAN Heat shock protein HSP 90-alpha	R.VFIM371DNCEELIPEYLNFIR.G	371										outside
P07947	YES	HUMAN Tyrosine-protein kinase Yes	K.NGYIPSNYVAPADSIQAEEW158YFGK.M	158										outside
P11142	HSP7C	HUMAN Heat shock cognate 71 kDa protein	K.NQVAM61NPTNTVFDAK.R	61										outside
P11413	G6PD	HUMAN Glucose-6-phosphate 1-dehydrogenase	K.NIHESCM159SQIGWNR.I	159										outside
P11586	C1TC	HUMAN C-1-tetrahydrofolate synthase, cytoplasmic	R.M747FGIPVVVAVNAFK.T	747										outside
P15311	EZRI	HUMAN Ezrin	R.THNDIIHNENM558R.Q	558										outside
P21796	VDAC1	HUMAN Voltage-dependent anion-selective channel protein 1	R.EHINLGC127DMDFDIAGPSIR.G	127										outside
P25705	ATPA	HUMAN ATP synthase subunit alpha, mitochondrial	K.GM105SLNLEPDNVGVVVFGNDK.L	105										outside
P26038	MOES	HUMAN Moesin	R.RKPDTIEVQQM305K.A	305										outside
P38606	VATA	HUMAN V-type proton ATPase catalytic subunit A	R.TALVANTSNM318PVAAR.E	318										outside
P40763	STAT3	HUMAN Signal transducer and activator of transcription 3	K.SQGDM185QDLNGNNQSVTR.Q	185										outside
P50570	DYN2	HUMAN Dynamin-2	R.AGVYPEKDQAENEDGAQENTFSM645DPQLER.Q	645										outside
P51148	RAB5C	HUMAN Ras-related protein Rab-5C	K.TAMNVNEIFM176AIAK.K	176										outside
P51149	RAB7A	HUMAN Ras-related protein Rab-7a	R.LVTM59QIWDTAGQER.F	59										outside
P53396	ACLY	HUMAN ATP-citrate synthase	R.SGGM666SNELNNIISR.T	666										outside
P61313	RL15	HUMAN 60S ribosomal protein L15	R.VLNSYW120VGEDSTYK.F	120										outside
P63244	GBLP	HUMAN Guanine nucleotide-binding protein subunit beta-2-like 1	M.TEQM5TLR.G	5										outside
Q01518	CAP1	HUMAN Adenylyl cyclase-associated protein 1	K.EMNDAAM162FYTNR.V	162										outside
Q07666	KHDR1	HUMAN KH domain-containing, RNA-binding, signal transduction-associated protein 1	R.SGSM21DPSGAHPSVR.Q	21										outside
Q6IAA8	LTOR1	HUMAN Ragulator complex protein LAMTOR1	K.TASNIIDVSAADSQGM76EQHEYMDR.A	76										outside
Q6NZI2	PTRF	HUMAN Polymerase I and transcript release factor	K.ATEM341VEVGADDDEGGAERGEAGDLR.R	341										outside
Q96TA1	NIBL1	HUMAN Niban-like protein 1	K.VQQVQPAM301QAVIR.T	301										outside
Q99714	HCD2	HUMAN 3-hydroxyacyl-CoA dehydrogenase type-2	R.LVAGEM136GQNEPDQGGQR.G	136										outside
Q9UJZ1	STML2	HUMAN Stomatin-like protein 2, mitochondrial	K.ASYGVEDPEYAVTQLAQTTM134R.S	134										outside
Q9Y490	TLN1	HUMAN Talin-1	K.VLGEAM1407TGISQNAK.N	1407										outside
