# Supplementary material for: Identification of potential sialic acid binding proteins on cell membranes by proximity chemical labeling
Source: Royal Society of Chemistry journal article supplement (doi:10.1039/c9sc01360a), 2019-01-01
Supplement: c9sc01360a5.xlsx [file c9sc01360a5.xlsx]

## Sheet: PNT2
Group1: sialylated glycoproteins
Gene Name	Sialylation	Transmembrane Domain
TFR1	Yes	Yes
CD44	Yes	Yes
TACD2	Yes	Yes
ASPH	Yes	Yes
1B07	Yes	Yes
ITB1	Yes	Yes
1A32	Yes	Yes
LMAN2	Yes	Yes
CD166	Yes	Yes
AMPN	Yes	Yes
EGFR	Yes	Yes
BASI	Yes	Yes
Group2: non-sialylated proteins with transmembrane domains
Gene Name	Sialylation	Transmembrane Domain
CLPT1	No	Yes
MYOF	No	Yes
VAPA	No	Yes
ITPR3	No	Yes
1A36	No	Yes
AT1A1	No	Yes
AT1B1	No	Yes
ESYT2	No	Yes
DHRS7	No	Yes
CKAP4	No	Yes
TM9S2	No	Yes
ORML3	No	Yes
CADM4	No	Yes
HM13	No	Yes
TMM40	No	Yes
VPP1	No	Yes
MAL2	No	Yes
S27A4	No	Yes
CASC4	No	Yes
AAAT	No	Yes
VAMP3	No	Yes
BAP31	No	Yes
OST48	No	Yes
CPT1A	No	Yes
1A11	No	Yes
PTN2	No	Yes
PGRC1	No	Yes
SCAM1	No	Yes
RER1	No	Yes
Group3: non-sialylated proteins without transmembrane domains
Gene Name	Sialylation	Transmembrane Domain
PPB1	No	No
NUMA1	No	No
HSP7C	No	No
DESP	No	No
EF1G	No	No
EF1A1	No	No
RBG10	No	No
K2C1	No	No
YES	No	No
HS90B	No	No
HMGB1	No	No
RRAS	No	No
BIP	No	No
RALB	No	No
RAB3B	No	No
RAB6A	No	No
ATPA	No	No
CTNA1	No	No
CTNB1	No	No
DYN2	No	No
RAB7A	No	No
RL15	No	No
RAC1	No	No
AP2B1	No	No
GNAS1	No	No
RHG21	No	No
RIF1	No	No
CPMD8	No	No
CCD47	No	No
HCD2	No	No
OSBL3	No	No
CLH1	No	No
SPTB2	No	No
KHDR1	No	No
G3BP1	No	No
PKP3	No	No
CALR	No	No

## Sheet: Caco-2(Undiff)
Group1: sialylated glycoproteins
Gene Name	Sialylation	Transmembrane Domain
RPN2	Yes	Yes
ENPL	Yes	No
Group2: non-sialylated proteins with transmembrane domains
Gene Name	Sialylation	Transmembrane Domain
AT1B1	No	Yes
GTR3	No	Yes
CADH1	No	Yes
DSG1	No	Yes
AAAT	No	Yes
HM13	No	Yes
AT1A1	No	Yes
PDIA4	No	Yes
VAMP3	No	Yes
RTN4	No	Yes
THIK	No	Yes
CKAP4	No	Yes
RPN2	No	Yes
AT1B1	No	Yes
GTR3	No	Yes
CADH1	No	Yes
DSG1	No	Yes
AAAT	No	Yes
HM13	No	Yes
AT1A1	No	Yes
PDIA4	No	Yes
VAMP3	No	Yes
RTN4	No	Yes
THIK	No	Yes
CKAP4	No	Yes
Group3: non-sialylated proteins without transmembrane domains
Gene Name	Sialylation	Transmembrane Domain
ATPA	No	No
MDHM	No	No
PPIA	No	No
RAC1	No	No
SPTB2	No	No
PFKAP	No	No
ATPB	No	No
DFFA	No	No
ACTN4	No	No
FLNB	No	No
PGK1	No	No
K2C1	No	No
G3P	No	No
RLA1	No	No
ENOA	No	No
G6PI	No	No
ANXA2	No	No
TBB5	No	No
PROF1	No	No
HS90A	No	No
HS90B	No	No
K1C19	No	No
RSSA	No	No
GSTP1	No	No
HMGB1	No	No
ANXA4	No	No
GRP78	No	No
HSP7C	No	No
C1TC	No	No
KCRB	No	No
ANXA3	No	No
XRCC5	No	No
EF2	No	No
K1C10	No	No
PLSL	No	No
PLST	No	No
SYDC	No	No
EZRI	No	No
NDKA	No	No
RS2	No	No
LEG3	No	No
PRS6A	No	No
VINC	No	No
PGAM1	No	No
RAB6A	No	No
FLNA	No	No
RS3	No	No
COF1	No	No
PTBP1	No	No
EF1G	No	No
1433T	No	No
PYR1	No	No
PDIA3	No	No
PUR9	No	No
1433B	No	No
MYH9	No	No
K22E	No	No
VATA	No	No
FAS	No	No
EFTU	No	No
GDIB	No	No
ANX11	No	No
ACLY	No	No
XPO2	No	No
ACTB	No	No
1433E	No	No
RAN	No	No
RL40	No	No
ACTG	No	No
ACTC	No	No
EF1A1	No	No
H31	No	No
TCPB	No	No
ARF1	No	No
CLH1	No	No
FABP5	No	No
CAP1	No	No
AHNK	No	No
ILF3	No	No
DYHC1	No	No
SRC8	No	No
PCBP1	No	No
DPYL2	No	No
PARK7	No	No
HCD2	No	No
COR1B	No	No
HN1L	No	No
GSTK1	No	No

## Sheet: Caco-2(Diff)
Group1: sialylated glycoproteins
Gene Name	Sialylation	Transmembrane Domain
ITB1	Yes	Yes
TFR1	Yes	Yes
BCAM	Yes	Yes
SUIS	Yes	Yes
ANO6	Yes	Yes
CBPD	Yes	Yes
DPP4	Yes	Yes
LCAP	Yes	Yes
GALT1	Yes	Yes
TMED4	Yes	Yes
SCRB2	Yes	Yes
NPTN	Yes	Yes
RPN2	Yes	Yes
FETA	Yes	No
ENPL	Yes	No
EGFR	Yes	Yes
Group2: non-sialylated proteins with transmembrane domains
Gene Name	Sialylation	Transmembrane Domain
APLP2	No	Yes
STIM1	No	Yes
GXLT1	No	Yes
SDC2	No	Yes
S15A1	No	Yes
S26A2	No	Yes
AAAT	No	Yes
KTN1	No	Yes
CAB45	No	Yes
GPC5C	No	Yes
UD2A3	No	Yes
GANAB	No	Yes
TMEDA	No	Yes
PPIB	No	Yes
SMIM1	No	Yes
STBD1	No	Yes
AT1A1	No	Yes
AT2B1	No	Yes
BAP31	No	Yes
SPCS2	No	Yes
TMED2	No	Yes
SCPDL	No	Yes
ORML3	No	Yes
NFXL1	No	Yes
TM9S2	No	Yes
PDIA4	No	Yes
NB5R3	No	Yes
OST48	No	Yes
DHB11	No	Yes
VAPA	No	Yes
Group3: non-sialylated proteins without transmembrane domains
Gene Name	Sialylation	Transmembrane Domain
FIBA	No	No
ATPA	No	No
CALR	No	No
SPTB2	No	No
CTNB1	No	No
ATPB	No	No
PLAK	No	No
NUMA1	No	No
RHOA	No	No
PPIA	No	No
ANXA2	No	No
TBB5	No	No
K1C19	No	No
G3P	No	No
CTND1	No	No
MYH9	No	No
CHD1L	No	No
BIP	No	No
ACTB	No	No
CTNA1	No	No
E41L1	No	No
AHNK	No	No
SPTN1	No	No
LAD1	No	No
ARPC3	No	No
ACTN4	No	No
FLNB	No	No
MYO1D	No	No
RAB3D	No	No
STAU1	No	No
PDIA1	No	No
VILI	No	No
RS17	No	No
C1TC	No	No
PABP1	No	No
XRCC5	No	No
EF2	No	No
KAP2	No	No
LEG3	No	No
RAB6A	No	No
VDAC1	No	No
FBRL	No	No
RS3	No	No
PTBP1	No	No
ANX13	No	No
PI4KA	No	No
COPA	No	No
XPO2	No	No
ARP3	No	No
1433G	No	No
ACTG	No	No
EF1A1	No	No
TCPB	No	No
CLH1	No	No
EWS	No	No
KHDR1	No	No
PDE4D	No	No
PCBP1	No	No
SC23A	No	No
AP1B1	No	No
KCC2D	No	No
CKAP5	No	No
MYH14	No	No
PLEC	No	No
NDRG1	No	No
CCD47	No	No
AP2M1	No	No
HCD2	No	No
RAB1B	No	No
CING	No	No
ERAP1	No	No
PCYOX	No	No
RAB1A	No	No

## Sheet: A549
Group1: sialylated glycoproteins
Gene Name	Sialylation	Transmembrane Domain
CAH12	Yes	Yes
ITB1	Yes	Yes
4F2	Yes	Yes
AMPN	Yes	Yes
CD44	Yes	Yes
1A25	Yes	Yes
BASI	Yes	Yes
ASPH	Yes	Yes
CD166	Yes	Yes
TFR1	Yes	Yes
RPN2	Yes	Yes
Group2: non-sialylated proteins with transmembrane domains
Gene Name	Sialylation	Transmembrane Domain
ITB5	No	Yes
PLXB2	No	Yes
INSR	No	Yes
PRIO	No	Yes
HM13	No	Yes
AAAT	No	Yes
MRP1	No	Yes
1A30	No	Yes
GTR1	No	Yes
1A23	No	Yes
PTSS2	No	Yes
ADT2	No	Yes
VAPA	No	Yes
STOM	No	Yes
MYOF	No	Yes
TM9S2	No	Yes
MGST1	No	Yes
CKAP4	No	Yes
ITPR3	No	Yes
SCAM1	No	Yes
BAP31	No	Yes
ILVBL	No	Yes
VAMP3	No	Yes
ESYT1	No	Yes
MYADM	No	Yes
PLRKT	No	Yes
SURF4	No	Yes
CD99	No	Yes
AT2B1	No	Yes
Group3: non-sialylated proteins without transmembrane domains
Gene Name	Sialylation	Transmembrane Domain
VIME	No	No
ATPB	No	No
ATPA	No	No
RHOA	No	No
RAC1	No	No
SPTB2	No	No
NUMA1	No	No
CCD47	No	No
HS90B	No	No
BIP	No	No
VINC	No	No
RAB6A	No	No
EF1G	No	No
FAS	No	No
ACTG	No	No
EF1A1	No	No
CLH1	No	No
GNAI2	No	No
HS90A	No	No
YES	No	No
HSP7C	No	No
G6PD	No	No
C1TC	No	No
EZRI	No	No
VDAC1	No	No
MOES	No	No
VATA	No	No
STAT3	No	No
DYN2	No	No
RAB5C	No	No
RAB7A	No	No
ACLY	No	No
RL15	No	No
RACK1	No	No
CAP1	No	No
KHDR1	No	No
LTOR1	No	No
CAVN1	No	No
NIBL1	No	No
HCD2	No	No
STML2	No	No
TLN1	No	No

## Sheet: Total
Group1: sialylated glycoproteins
Gene Name	Sialylation	Transmembrane Domain
TFR1	Yes	Yes
CD44	Yes	Yes
TACD2	Yes	Yes
ASPH	Yes	Yes
1B07	Yes	Yes
ITB1	Yes	Yes
1A32	Yes	Yes
LMAN2	Yes	Yes
CD166	Yes	Yes
BCAM	Yes	Yes
SUIS	Yes	Yes
ANO6	Yes	Yes
CBPD	Yes	Yes
DPP4	Yes	Yes
LCAP	Yes	Yes
GALT1	Yes	Yes
TMED4	Yes	Yes
SCRB2	Yes	Yes
NPTN	Yes	Yes
RPN2	Yes	Yes
CAH12	Yes	Yes
4F2	Yes	Yes
AMPN	Yes	Yes
1A25	Yes	Yes
BASI	Yes	Yes
ENPL	Yes	No
FETA	Yes	No
EGFR	Yes	Yes
Group2: non-sialylated proteins with transmembrane domains
Gene Name	Sialylation	Transmembrane Domain
CLPT1	No	Yes
MYOF	No	Yes
VAPA	No	Yes
ITPR3	No	Yes
1A36	No	Yes
AT1A1	No	Yes
AT1B1	No	Yes
ESYT2	No	Yes
DHRS7	No	Yes
CKAP4	No	Yes
TM9S2	No	Yes
ORML3	No	Yes
CADM4	No	Yes
HM13	No	Yes
TMM40	No	Yes
VPP1	No	Yes
MAL2	No	Yes
S27A4	No	Yes
CASC4	No	Yes
AAAT	No	Yes
VAMP3	No	Yes
BAP31	No	Yes
OST48	No	Yes
CPT1A	No	Yes
1A11	No	Yes
PTN2	No	Yes
PGRC1	No	Yes
SCAM1	No	Yes
RER1	No	Yes
GTR3	No	Yes
CADH1	No	Yes
DSG1	No	Yes
PDIA4	No	Yes
RTN4	No	Yes
THIK	No	Yes
ITB5	No	Yes
PLXB2	No	Yes
INSR	No	Yes
PRIO	No	Yes
MRP1	No	Yes
1A30	No	Yes
GTR1	No	Yes
1A23	No	Yes
PTSS2	No	Yes
ADT2	No	Yes
STOM	No	Yes
MGST1	No	Yes
ILVBL	No	Yes
ESYT1	No	Yes
MYADM	No	Yes
PLRKT	No	Yes
SURF4	No	Yes
CD99	No	Yes
AT2B1	No	Yes
Group3: non-sialylated proteins without transmembrane domains
Gene Name	Sialylation	Transmembrane Domain
PPB1	No	No
NUMA1	No	No
HSP7C	No	No
DESP	No	No
EF1G	No	No
EF1A1	No	No
RBG10	No	No
K2C1	No	No
YES	No	No
HS90B	No	No
HMGB1	No	No
RRAS	No	No
BIP	No	No
RALB	No	No
RAB3B	No	No
RAB6A	No	No
ATPA	No	No
CTNA1	No	No
CTNB1	No	No
DYN2	No	No
RAB7A	No	No
RL15	No	No
RAC1	No	No
AP2B1	No	No
GNAS1	No	No
RHG21	No	No
RIF1	No	No
CPMD8	No	No
CCD47	No	No
HCD2	No	No
OSBL3	No	No
CLH1	No	No
SPTB2	No	No
KHDR1	No	No
G3BP1	No	No
PKP3	No	No
CALR	No	No
MDHM	No	No
PPIA	No	No
PFKAP	No	No
ATPB	No	No
DFFA	No	No
ACTN4	No	No
FLNB	No	No
PGK1	No	No
G3P	No	No
RLA1	No	No
ENOA	No	No
G6PI	No	No
ANXA2	No	No
TBB5	No	No
PROF1	No	No
HS90A	No	No
K1C19	No	No
RSSA	No	No
GSTP1	No	No
ANXA4	No	No
GRP78	No	No
C1TC	No	No
KCRB	No	No
ANXA3	No	No
XRCC5	No	No
EF2	No	No
K1C10	No	No
PLSL	No	No
PLST	No	No
SYDC	No	No
EZRI	No	No
NDKA	No	No
RS2	No	No
LEG3	No	No
PRS6A	No	No
VINC	No	No
PGAM1	No	No
FLNA	No	No
RS3	No	No
COF1	No	No
PTBP1	No	No
1433T	No	No
PYR1	No	No
PDIA3	No	No
PUR9	No	No
1433B	No	No
MYH9	No	No
K22E	No	No
VATA	No	No
FAS	No	No
EFTU	No	No
GDIB	No	No
ANX11	No	No
ACLY	No	No
XPO2	No	No
ACTB	No	No
1433E	No	No
RAN	No	No
RL40	No	No
ACTG	No	No
ACTC	No	No
H31	No	No
TCPB	No	No
ARF1	No	No
FABP5	No	No
CAP1	No	No
AHNK	No	No
ILF3	No	No
DYHC1	No	No
SRC8	No	No
PCBP1	No	No
DPYL2	No	No
PARK7	No	No
COR1B	No	No
HN1L	No	No
GSTK1	No	No
FIBA	No	No
PLAK	No	No
RHOA	No	No
CTND1	No	No
CHD1L	No	No
E41L1	No	No
SPTN1	No	No
LAD1	No	No
ARPC3	No	No
MYO1D	No	No
RAB3D	No	No
STAU1	No	No
PDIA1	No	No
VILI	No	No
RS17	No	No
PABP1	No	No
KAP2	No	No
VDAC1	No	No
FBRL	No	No
ANX13	No	No
PI4KA	No	No
COPA	No	No
ARP3	No	No
1433G	No	No
EWS	No	No
PDE4D	No	No
SC23A	No	No
AP1B1	No	No
KCC2D	No	No
CKAP5	No	No
MYH14	No	No
PLEC	No	No
NDRG1	No	No
AP2M1	No	No
RAB1B	No	No
CING	No	No
ERAP1	No	No
PCYOX	No	No
RAB1A	No	No
VIME	No	No
GNAI2	No	No
G6PD	No	No
MOES	No	No
STAT3	No	No
RAB5C	No	No
RACK1	No	No
LTOR1	No	No
CAVN1	No	No
NIBL1	No	No
STML2	No	No
TLN1	No	No
