# Supplementary material for: Identification of potential sialic acid binding proteins on cell membranes by proximity chemical labeling
Source: Royal Society of Chemistry journal article supplement (doi:10.1039/c9sc01360a), 2019-01-01
Supplement: c9sc01360a6.xlsx [file c9sc01360a6.xlsx]

## Sheet: binding
The list of oxidized proteins with the binding function and their oxidation sites in four cell lines
*Proteins are list with their Gene names
	PNT2	A549	Caco-2	Caco-2 (Differentiated)
ATPA	M51	M51	M51, M95	M433, M51
CPMD8	C245
DESP	M2819
G3BP1	M109
GNAS1	Y833
LMAN2	M271
PGRC1	P177
PKP3	M542
RALB	P139
RRAS	M93
VPP1	M355
GNAI2		M82
INSR		W516
ITB5		M624
STAT3		M185
CADH1			M670
COF1			M18
COR1B			P417
DSG1			Y423
DYHC1			M3372, M4338, M505
GDIB			M424
ILF3			M465
PARK7			M17
PLSL			M166
PLST			M169
PROF1			M86
RL40			M1
SRC8			M448
SYDC			M362
ARPC3				M9
CAB45				M139
CKAP5				M1470
CTND1				M893, M158
DPP4				M348, M591
EWS				M275
FBRL				M87
MYO1D				M215
NFXL1				W247
PLEC				M319
SC23A				M34, M526
VILI				M380
HMGB1	M13		M13
CALR	W261			W33, C115, Y119, F46
CTNA1	M560			M849, M452
CTNB1	M553			M480
EGFR	M318, M567, M600			M318
AT2B1		M466		M466
RHOA		M134		M134
ITB1	M149, 512	M512		M512
KHDR1	M108	M21		M21
AHNK			M1096	M502, M1236
LEG3			M130	M130
PCBP1			M137	M87
RS3			M236	M236
TCPB			M62, M445	M480
XRCC5			M389	M461
CCD47	M376	M445
CD44	M725	M725
DYN2	M645	M645
ITPR3	M2608, M1044	M2608
YES	W158	W158
HSP7C	M61, N87	M61	M61, M122
RAC1	M145	P140	M145
CAP1		M162	M162
ATPB		Y269	M509, M272, M145	M217
TBB5			M330, M267, M147, M233	M330, V236, C239

## Sheet: catalytic activity
The list of oxidized proteins with the catalytic activity function and their oxidation sites in four cell lines
*Proteins are list with their Gene names
	PNT2	A549	Caco-2	Caco-2 (Differentiated)
MRP1		M896
ILVBL		M138
SURF4		M7
RAB5C		M176
PLXB2		P526
G6PD		M159
MGST1		M27
ACLY		M666
RAB7A	M59	M59
GNAS1	Y833
RAB3B	M187
CLPT1	M222
CPMD8	C245
S27A4	M550
FAS		M2041	M2041
VATA		M318	M318, M368
EF1G	M263, P259	M263, P259	M263, P259
AT1B1	M121		M121
PGK1			M251
THIK			P250
RALB	P139
RRAS	M93
VPP1	M355
GNAI2		M82
DYN2	M645	M645
HSP7C	M61, N87	M61	M61, M122
RAC1	M145	P140	M145
CAP1		M162	M162
PDIA3			M434
DYHC1			M3372, N4338, M505
PUR9			P58
RAN			M179
DPYL2			M375
SYDC			M362
ENOA			M165, M244
PYR1			M522
MDHM			M251
KCRB			M377
PFKAP			M39
RS3			M236	M236
RPN2		M337	Y198	M337
C1TC		M747	M747	M747
ATPB		Y269	M509, M272, M145	M217
RAB6A	M177	M177	M136	M136
HCD2	M136	M136	M136	M136
ATPA	M51	M51	M51, M95	M433, M51
EF1A1	M201, M404, M276	M201, M404, M276	M201, M404, M276	M201, M404, M276
AT1A1	M734		M734	M734
DHB11				M246
RAB3D				M187
PI4KA				H1237
GANAB				M666
MYO1D				M215
FBRL				M87
DPP4				M348, M591
RAB1A				M166, M176
SC23A				M34, M526
UD2A3				M341
PDIA4				M583, M358
CBPD				M138, M563
PCYOX				L75
G3P				M175, M133
PDIA1				M425
OST48	M202			M212
AT2B1		M466		M466
RHOA		M134		M134
PCBP1			M137	M87
KHDR1	M108	M21		M21

## Sheet: receptor activity 
The list of oxidized proteins with the receptor activity function and their oxidation sites in four cell lines
*Proteins are list with their Gene names
	PNT2	A549	Caco-2	Caco-2 (Differentiated)
PLXB2		P526
INSR		W516
ITPR3	M2608, M1044	M2608
CD166	M216, P351	M216, C113
CD44	M725	M725
ATPB		Y269	M509, M272, M145	M217
ATPA	M51	M51	M51, M95	M433, M51
SCRB2				M337
BCAM				M92
GPC5C				M413
EGFR	M318, M567, M600			M318

## Sheet:  transducer activity
The list of oxidized proteins with the signal transducer activity function and their oxidation sites in four cell lines
*Proteins are list with their Gene names
	PNT2	A549	Caco-2	Caco-2 (Differentiated)
PLXB2		P526
INSR		W516
GNAI2		M82
ITPR3	M2608, M1044	M2608
CD44	M725	M725
GNAS1	Y833
RAC1	M145	P140	M145
TMED4				P70
TMEDA				M168
TMED2				M86
RHOA		M134		M134
EGFR	M318, M567, M600			M318

## Sheet:  structural molecule activity 
The list of oxidized proteins with the structural molecule activity function and their oxidation sites in four cell lines
*Proteins are list with their Gene names
	PNT2	A549	Caco-2	Caco-2 (Differentiated)
STOM		M134
MOES		M305
STML2		M134
RL15	W120	W120
MAL2	M1
DESP	M2819, M62
RL40			M1
RSSA			M34, M10
ACTC			M84
RS2			M215
COF1			M18
SRC8			M448
RLA1			W43
EZRI		M558	M12, M90
RS3			M236	M236
ACTG		M153, M283, P264	M16	M16
E41L1				M724
VILI				M380
MYO1D				M215
PLEC				M3190
CTNA1	M560			M452, M849
ACTB			M16, M269, M283, M153	M16, M269, M283, M153
TBB5			M330, M267, M147, M233	M330, V236, C239

## Sheet: translation regulator activity
The list of oxidized proteins with the translation regulator activity function and their oxidation sites in four cell lines
*Proteins are list with their Gene names
	PNT2	A549	Caco-2	Caco-2 (Differentiated)
EFTU			M442
EF2			M341	M494
EF1A1	M404, M276, M201	M404, M276, M201	M404, M102, M276	M404

## Sheet: transporter activity
The list of oxidized proteins with the transporter activity function and their oxidation sites in four cell lines
*Proteins are list with their Gene names
	PNT2	A549	Caco-2	Caco-2 (Differentiated)
MRP1		M896
ITPR3	M2608, M1044	M2608
VPP1	M355
S27A4	M550
VATA		M318	M318, M368
AT1B1	M121		M121
XPO2			M920	M920
ATPB		Y269	M509, M272, M145	M217
AAAT	M541	M541	M541	M541
ATPA	M51	M51	M51, M95	M433, M51
AT1A1	M734		M734	M734
S26A2				M88
S15A1				M699
STIM1				M527
AT2B1		M466		M466
VDAC1		C127		W210
